RESEARCH ARTICLE

# Extreme metal adapted, knockout and knockdown strains reveal a coordinated gene expression among different *Tetrahymena thermophila* metallothionein isoforms

Patricia de Francisco<sup>1</sup>, Ana Martín-González<sup>1</sup>, Aaron P. Turkewitz<sup>2</sup>, Juan Carlos Gutiérrez<sup>1\*</sup>

**1** Departamento de Microbiología-III, Facultad de Biología, Universidad Complutense de Madrid (UCM), Madrid, Spain, **2** Department of Molecular Genetics and Cell Biology, Cummings Life Sciences Center, University of Chicago, Chicago, Illinois, United States of America

\* [juancar@bio.ucm.es](mailto:juancar@bio.ucm.es)

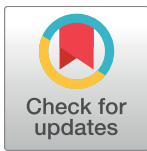

**OPEN ACCESS**

**Citation:** de Francisco P, Martín-González A, Turkewitz AP, Gutiérrez JC (2017) Extreme metal adapted, knockout and knockdown strains reveal a coordinated gene expression among different *Tetrahymena thermophila* metallothionein isoforms. PLoS ONE 12(12): e0189076. <https://doi.org/10.1371/journal.pone.0189076>

**Editor:** Serena Aceto, University of Naples Federico II, ITALY

**Received:** August 22, 2017

**Accepted:** November 17, 2017

**Published:** December 5, 2017

**Copyright:** This is an open access article, free of all copyright, and may be freely reproduced, distributed, transmitted, modified, built upon, or otherwise used by anyone for any lawful purpose. The work is made available under the [Creative Commons CC0](https://creativecommons.org/licenses/by/4.0/) public domain dedication.

**Data Availability Statement:** All relevant data are within the paper and its supporting information files.

**Funding:** This work was supported by MINECO CGL2016-75494-R; NIH GM-105783; A PhD scholarship was awarded to PdF by the Spanish Ministry of Education (FPU12/02789). The funders had no role in study design, data collection and analysis, decision to publish, or preparation of the manuscript.

## Abstract

Metallothioneins (MT) constitute a superfamily of small cytosolic proteins that are able to bind metal cations through numerous cysteine (Cys) residues. Like other organisms the ciliate *Tetrahymena thermophila* presents several MT isoforms, which have been classified into two subfamilies (Cd- and Cu-metallothioneins). The main aim of this study was to examine the specific functions and transcriptional regulation of the five MT isoforms present in *T. thermophila*, by using several strains of this ciliate. After a laboratory evolution experiment over more than two years, three different *T. thermophila* strains adapted to extreme metal stress (Cd<sup>2+</sup>, Cu<sup>2+</sup> or Pb<sup>2+</sup>) were obtained. In addition, three knockout and/or knockdown strains for different metallothionein (MT) genes were generated. These strains were then analyzed for expression of the individual MT isoforms. Our results provide a strong basis for assigning differential roles to the set of MT isoforms. *MTT1* appears to have a key role in adaptation to Cd. In contrast, *MTT2/4* are crucial for Cu-adaptation and *MTT5* appears to be important for Pb-adaptation and might be considered as an “alarm” MT gene for responding to metal stress. Moreover, results indicate that likely a coordinated transcriptional regulation exists between the MT genes, particularly among *MTT1*, *MTT5* and *MTT2/4*. *MTT5* appears to be an essential gene, a first such report in any organism of an essential MT gene.

## Introduction

Metals are natural components of the Earth’s crust, and some are essential in low concentrations for cellular metabolism and growth. Examples include metal co-factors in enzymatic reactions (e.g., metalloenzymes), and stabilization of some biological molecules. On the other hand, many non-essential metals are known as the most abundant, persistent and toxic inorganic pollutants on our planet [1]. Metal toxicity can arise from interaction with biomolecules, such as proteins or nucleic acids, whose native structure and function may be thereby altered. Moreover, metal toxicity often produces oxidative stress that generates reactive oxygen species,

**Competing interests:** The authors have declared that no competing interests exist.

which can perturb protein structures or enzymatic functions, impair DNA repair, and inhibit cell proliferation and differentiation processes, in some cases leading to necrotic or apoptotic cell death [2–4].

Organisms have evolved a range of mechanisms to reduce metal toxicity. One of the most universal cellular detoxification processes is the chelation of metal cations by specific oligopeptides (glutathione, phytochelatins) or proteins (metallothioneins). This mechanism allows the sequestration of metallic ions by the -SH groups of the cysteine residues and their intracellular storage in vacuoles or cytoplasmic inclusions. Then, these metal-protein complexes are expelled from the cell as non-toxic or rarely toxic compounds [5].

Metallothioneins (MTs) constitute a superfamily of small cytosolic proteins that are able to bind metal cations through numerous cysteine (Cys) residues [5–6]. These proteins have been reported in a wide variety of organisms: prokaryotic and eukaryotic microorganisms, plants, invertebrates and vertebrates. The range of specific functions of these proteins is not yet clear. Among the proposed functions are the regulation of essential-metal homeostasis [7], metal detoxification [8], protection against oxidative stress [9], and regulation of cell proliferation and apoptosis [10]. In mammals, MTs function in protection against neurodegenerative diseases [11] and in several cellular differentiation processes [12]. Broadly speaking, MTs have been considered as multifunctional proteins [10, 13] and as key elements of the cellular integrated stress response program [14]. The majority of MT gene expression studies, carried out in many different organisms, have reported that these genes are regulated primarily at the transcriptional level [10, 15], although some evidence of regulation at translational level exists [16]. That is, MT genes are often expressed constitutively but are up-regulated upon exposure to metals or other environmental stressors [17–23]. MTs have not been reported to be essential, but they are likely to provide survival advantages under some stress conditions [24, 25].

Ciliate MTs have unique features with respect to MTs from other organisms. The proteins are longer and richer in Cys residues, conferring a larger metal binding capacity compared to classic MTs [6]. The MTs in *T. thermophila* belong to family 7, which can be resolved into two well-characterized subfamilies. Subfamily 7a corresponds to CdMT (cadmium-metallothioneins), while 7b corresponds to CuMT (copper-metallothioneins). These two subfamilies differ mainly in their distributions of conserved cysteines, and in their preferential transcriptional induction by cadmium or copper, respectively [5, 6, 26]. *T. thermophila* has five MT isoforms: three CdMT (MTT1, MTT3 and MTT5) and two CuMT (MTT2 and MTT4) [20]. Previously, it was found that the individual CdMT genes have different induction patterns, suggesting functional diversification [20]. One basis for this differential transcription may be found in the promoter regions: the five *T. thermophila* MT genes have different numbers of a conserved MTCM1 motif, which is relevant for regulation by AP-1 transcription factors (bZIP) [6, 20]. The MTT5 promoter has 13 MTCM1 motifs and this gene shows strongest induction after metal exposure, while the MTT3 promoter has 2 MTCM1 motifs and is the most weakly induced *T. thermophila* MT gene [20]. The gene expression results [20] were corroborated by Espart and colleagues [27] who analysed the metal binding preferences of the *T. thermophila* MTs. MTT1 and MTT5 isoforms preferentially bind Cd<sup>2+</sup> ions, while MTT3 preferentially binds Zn<sup>2+</sup>. Both MTT2 and MTT4 isoforms mainly form homometallic Cu-complexes [27].

Microorganisms can acquire stress tolerance and novel metabolic abilities when they are exposed to selective pressure [28]. An experimental approach to study this phenomenon has been called "evolutionary engineering" [29]. Studies in which cells are forced to adapt to increasing levels of specific stressors can provide insights into the physiological and genetic mechanisms involved in cellular responses to environmental stressors. As the stressor intensity is progressively increased, the cells' deployment of protective mechanisms against toxicity is

likely to involve enhancing a set of mechanisms involved in the normal cellular response, which can thus be more easily detected and studied through such studies. Experiments of this type have been carried out in diverse organisms to artificially evolve resistance to abiotic stressors including high salt [30], copper, cadmium [28, 31] or alcohols [32]. There are also examples of adapted microorganisms that have developed new properties with industrial applications, an example being yeasts able to ferment xylose [33] or lactose [34].

Knockout (KO) strains are basic tools for assessing the function and relevance of specific genes [35]. Some genes are designated essential, because their total knockout is incompatible with cell viability. In such cases, gene function can be studied by reducing gene copy number or expression to generate a knockdown (KD) strain, using specific interference RNAs or other methods.

Even in well-studied model organisms, there remain many unanswered questions concerning differential expression of MT isoforms and the genetic bases of adaptation to severe metal stress. The ciliate *T. thermophila* is a very useful model for addressing these issues in eukaryotic microorganisms [5]. The main aim of this study was to examine the specific functions and transcriptional regulation of the five MT isoforms. In particular, we used qRT-PCR (quantitative reverse transcription polymerase chain reaction) to analyze the expression patterns of the five MT genes in a set of *T. thermophila* strains: the reference strain SB1969, two strains engineered to over-express *MTT1* or *MTT5* gene [36], three metal-adapted strains (adapted to extreme  $\text{Cd}^{2+}$ ,  $\text{Cu}^{2+}$  or  $\text{Pb}^{2+}$  concentrations) and three KO and/or KD strains targeting *MTT1* and/or *MTT5*.

## Materials and methods

### Strains and culture conditions

*Tetrahymena thermophila* strain CU428 (*mpr1-1/mpr1-1*; pm-S, mp-S, mt VII) was used to obtain the KO and/or KD strains. SB1969 (*chx1-1/chx1-1*, *mpr1-1/mpr1-1*; pm-S, cy-S, mt II), kindly supplied by Dr. E. Orias (University of California, Santa Barbara, USA), was used as a control in gene expression studies, and was also used to obtain the metal-adapted strains. Micronuclear genotypes of these strains are homozygous *mpr1-1* (6-methyl-purine resistant) or *chx1-1* (cycloheximide resistant), respectively. Their macronuclear phenotypes are pm-S (paromomycin sensitive), mp-S (6-methyl-purine sensitive) or cy-S (cycloheximide sensitive) and their mating types (mt) are VII or II. Strains GFPMTT1 and GFPMTT5 harbour multi-copy plasmids bearing the constructs  $P_{MTT1}::GFP::MTT1$  or  $P_{MTT5}::GFP::MTT5$ , which over-express *MTT1* or *MTT5*, respectively [36].

Cells were axenically grown in PP210 medium [2% w/v proteose peptone (Pronadisa), supplemented with 10  $\mu\text{M}$   $\text{FeCl}_3$  and 250  $\mu\text{g}/\text{ml}$  of streptomycin sulphate (Calbiochem) and penicillin G (Sigma)] or SPPA medium [2% proteose peptone (Difco), 0.1% yeast extract (Difco), 0.2% glucose (Sigma), 0.003% Fe-EDTA (Sigma), supplemented with 250  $\mu\text{g}/\text{ml}$  of streptomycin sulphate, 250  $\mu\text{g}/\text{ml}$  of penicillin G (Sigma) and 0.25  $\mu\text{g}/\text{ml}$  of amphotericin B (Sigma)], and maintained at a constant temperature of  $30 \pm 1^\circ\text{C}$ . We added 12  $\mu\text{g}/\text{ml}$  of paromomycin sulphate (Sigma) in the GFPMTT1 and GFPMTT5 cultures to maintain the multi-copy plasmid.

### Extreme metal-adaptation of *T. thermophila* strains

Three *T. thermophila* metal-adapted strains were generated: Cd-adap (cadmium-adapted strain), Cu-adap (copper-adapted strain) and Pb-adap (lead-adapted strain). These metal-adapted strains were obtained after exposing strain SB1969 in PP210 medium to increasing metal concentrations [ $\text{Cd}^{2+}$  ( $\text{CdCl}_2$ , Sigma),  $\text{Cu}^{2+}$  ( $\text{CuSO}_4 \cdot 5 \text{H}_2\text{O}$ , Sigma) or  $\text{Pb}^{2+}$  ( $\text{Pb}(\text{NO}_3)_2$ ,

Sigma)]. The adaptation process consisted on increasing 10  $\mu$ M the metal concentration every week, and during about 15 months of increasing metal concentrations the survivor cells were selected until achieving their maximum tolerated concentration (MTC). Then, cells were maintained to this MTC during more than two years to complete their metal adaptation. The MTC was achieved at different time periods depending on type of metal. Metal-adapted strains were permanently maintained in PP210 medium with the MTC of the relevant metal (indicated as MTC cultures).

## Isolating MT knockout / knockdown strains

Constructs in Fig 1 were obtained by the directional cloning of the 5' and 3' UTRs of the *T. thermophila* *MTT1* and *MTT5* genes in the pNeo4 and *rpl29* vectors. First, we amplified the 5' and 3' UTRs regions of the *MTT1* and *MTT5* genes using primers *5UTRMTT1A/1B* and *3UTRMTT1A/1B* for *MTT1* and *5UTRMTT5A/5B* and *3UTRMTT5A/5B* for *MTT5* (S1 Table, Fig 1). To obtain single *MTT1* or *MTT5* knockouts, we introduced each amplified UTR into pNeo4 after cutting with NotI HF and PstI (New England Biolabs) for the 5' UTRs and HindIII and XhoI (New England Biolabs) for the 3' UTRs, to obtain pNeo4::*MTT1* and pNeo4::*MTT5*. These contain the neomycin/paromomycin resistance genes under the control of the cadmium-inducible *MTT1* promoter (neo4 cassette) [37] and both flanked by the UTR regions of *MTT1* or *MTT5*, respectively (Fig 1). To isolate a double KO (*MTT1*KO + *MTT5*KO) beginning with a complete *MTT1*KO, we prepared a *MTT5* knockout construct, pCHXMTT5, using the *rpl29* vector. The UTR regions of *MTT5* were incorporated into the *rpl29* vector using NotI HF and PstI for the 5' UTR and HindIII and XhoI for the 3' UTR. The *rpl29* vector contains the cycloheximide resistance gene (*rpl29*) under the control of the *MTT1* promoter and both were flanked by the *MTT5* UTRs (Fig 1). Before transformation, the correct constructions were verified by sequencing.

Plasmids were introduced by biolistic transformation. Gold bombardment particles (Seashell Technology) at 30 mg/ml concentration were coated, immediately before use, with 5  $\mu$ g of DNA/1 mg gold particles. CU428 ( $3 \times 10^5$  cells/ml) were starved for 16-18h (TrisHCl buffer 0.01M pH 6.8). The starved cells (30 ml) were centrifuged at 1,100g for 1 min and resuspended in 1 ml of Tris HCl buffer. Then, 1ml cell sample was evenly spread on a sterile circular filter paper and immediately bombarded with the DNA coated gold particles at 900 psi using the DuPont Biolistic PDS-1000/He, Particle Delivery System (Biorad) [38]. Cells were then resuspended in 50 ml of 2% proteose peptone (PP2) medium and maintained with shaking at 30°C for 4-5h. Transformants were selected with 120  $\mu$ g/ml of paromomycin with 1  $\mu$ g/ml CdCl<sub>2</sub>, which drives neo4 expression from the *MTT1* promoter. For selecting double knockouts, transformant cells were selected with 12  $\mu$ g/ml of cycloheximide with 1  $\mu$ g/ml CdCl<sub>2</sub>. Cells were transferred daily during at least three weeks under increasing concentrations of paromomycin or cycloheximide, while reducing CdCl<sub>2</sub> to drive phenotypic assortment. By this procedure, *MTT1* or *MTT5* genes were progressively substituted by the resistance cassette, initially integrated at a single site by homologous recombination, until all the *MTT1* or *MTT5* macronuclear gene copies were eliminated (knockout fixation).

We checked that knockout was complete by maintaining the putative KO cells without the antibiotic selective agent for one week. We then isolated total RNA, reverse-transcribed it to obtain the corresponding cDNAs, and carried out standard PCR to check if there were remaining copies of *MTT1* or *MTT5* in the macronuclear genome. The *MTT1*KO was complete but in the putative *MTT5*KO strain it was not possible to obtain cells lacking all copies of *MTT5* gene; thus we consider it as a knockdown (*MTT5*KD) strain. Similarly, we generated a *MTT1*KO + *MTT5*KD strain. Both knockdown strains are inherently unstable, because

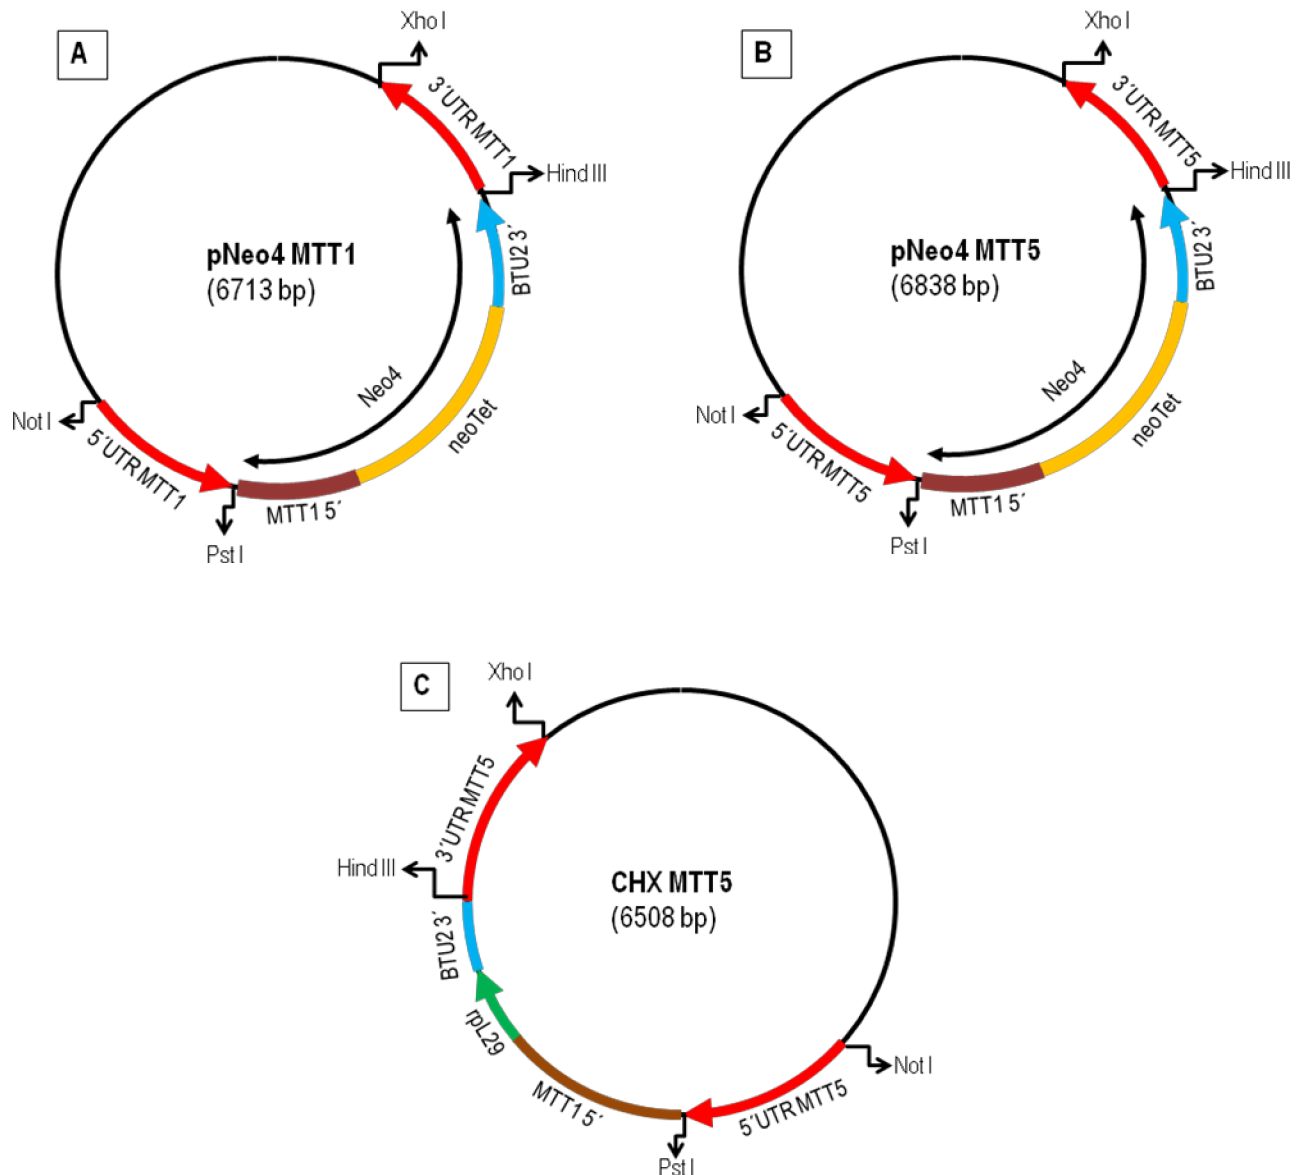

**Fig 1. Schematic representation of the plasmid constructs used to obtain knockout and/or knockdown strains.** (A): plasmid construct (pNeo4MTT1) used for MTT1KO strain. (B): plasmid construct (pNeo4MTT5) used for MTT5KD. (C): plasmid construct (pCHXMTT5) used for obtaining MTT1KO + MTT5KD. neoTet: neomycin/paromomycin resistance gene. rpl29: cycloheximide resistance gene. BTU2 3': part of the 3'UTR region of the  $\beta$ -tubulin 2 gene.

<https://doi.org/10.1371/journal.pone.0189076.g001>

without selective pressure the gene copy number of MTT5 can increase. To prevent this, we maintained the cells in 800  $\mu\text{g/ml}$  of paromomycin (for MTT5KD) or 60  $\mu\text{g/ml}$  of cycloheximide (for MTT1KO + MTT5KD).

### Metal stress treatments

Cells were exposed for 1 or 24h to  $\text{Cd}^{2+}$ ,  $\text{Cu}^{2+}$  or  $\text{Pb}^{2+}$ . Control, KO and KD strains were treated with 44.5  $\mu\text{M}$  ( $\text{Cd}^{2+}$ ), 315  $\mu\text{M}$  ( $\text{Cu}^{2+}$ ) or 965  $\mu\text{M}$  ( $\text{Pb}^{2+}$ ), while metal-adapted, GFPMTT1 and GFPMTT5 strains were exposed to the MTC for each metal: 115  $\mu\text{M}$   $\text{Cd}^{2+}$ , 4 mM  $\text{Cu}^{2+}$  or 5.5 mM  $\text{Pb}^{2+}$ . In some experiments with the metal adapted strains, cells were

maintained for 24h in PP210 without any added metal and then were exposed for 1 or 24h to the MTC of each metal. The MTC cultures were obtained by continuously culturing cells at their maximum tolerated metal concentration. To study the persistence of the metal adaptation process, we grew the metal adapted strains for 1 or 6 months in PP210 medium in the absence of added metal. Following these periods, cells were again incubated for 1 or 24h in the presence of the MTC of each metal.

### Total RNA isolation and cDNA synthesis

Cultures ( $1-3 \times 10^5$  cells/ml) of the different *T. thermophila* strains were harvested by centrifugation at 2,800 rpm for 3 min. Total RNA samples were isolated from exponential cell cultures by using the TRI Reagent method (Molecular Research Center, MRC). RNA samples were treated with DNase I (Roche) for 30 min at 37°C and visualized following agarose gel electrophoresis. RNA concentrations were determined using NanoDrop 1000 (Thermo Scientific). MultiScribe Reverse Transcriptase 50 units/ $\mu$ l (Life Technologies) and oligo(dT)-adaptor primer (Roche) were used to synthesize the cDNAs from 3.5  $\mu$ g of total RNA samples.

### Quantitative RT-PCR (qRT-PCR)

cDNA samples were amplified in duplicate in 96 microtiter plates. Each qPCR reaction (20  $\mu$ l) contained: 10  $\mu$ l of SBYR Green (Takara), 0.4  $\mu$ l of ROX as passive reference dye (Takara), 1  $\mu$ l of each primer (at 400 nM final concentration), 3.6  $\mu$ l of ultrapure sterile water (Roche) and 4  $\mu$ l of a  $10^{-1}$  dilution of cDNA. PCR primers (S1 Table) were designed using the "Primer Quest and Probe Design" online-application of IDT (Integrated DNA Technologies).  $\beta$ -actin was used as an endogenous control or a normalizer gene. Melting curves were obtained and primers specificity was tested by confirming each PCR product by gel electrophoresis and sequencing. Real-time PCR reactions were carried out in an iQ5 real-time PCR apparatus (Bio-Rad) and the thermal cycling protocol was as follows: 5 min at 95°C, 40 cycles (30 sec at 95°C, 30 sec at 55°C and 20 sec at 72°C), 1 min at 95°C and 1 min at 55°C. All controls (no template control and RT minus control) were negative. Amplification efficiency (E) was measured by using 10-fold serial dilutions of a positive control PCR template. The efficiency requirement was met for all the tested genes in all the used strains (S2 Table). Results were finally processed by the standard-curve method [39] and were corroborated with at least two independent experiments, each performed in duplicate. We compared the basal expression levels of different genes using the formula:  $2^{(C_{t1}-C_{t2})}$ , being  $C_{t1}$  and  $C_{t2}$  the cycle threshold ( $C_t$ ) values of both genes under a control situation (no metal exposure).

### Statistical analysis

Gene expression differences were tested for statistical significance by Student's t test using the program Statgraphics Centurion XVI (16.1.15 version). P-value was fixed in  $\leq 0.05$ .

## Results

### Comparative MT gene expression analysis among different strains of *T. thermophila*

Over a period of more than two years, we adapted three *T. thermophila* cultures to high concentrations of metals. These were named Cd-adap, Cu-adap and Pb-adap. The maximum tolerated concentrations (MCT) were 115  $\mu$ M Cd<sup>2+</sup>, 4 mM Cu<sup>2+</sup>, and 5.5 mM Pb<sup>2+</sup>. These MCT values are substantially higher than the LC<sub>50</sub> values (lethal concentration killing 50% of cell population) previously determined for the parental SB1969 strain in PP210 medium (24 h

exposure):  $\approx 2.5x$  the  $LC_{50}$  for  $Cd^{2+}$  (44.5  $\mu M$ ),  $\approx 12.7x$  the  $LC_{50}$  for  $Cu^{2+}$  (315  $\mu M$ ), and  $\approx 5.7x$  the  $LC_{50}$  for  $Pb^{2+}$  (965  $\mu M$ ) [20]. In the course of constructing KO strains, we found that it was impossible to disrupt all macronuclear copies of *MTT5*, indicating that the gene is essential. Therefore, the strain that we obtained should be considered a knockdown (*MTT5KD*). In total, we obtained a *MTT1KO* strain, a double mutant *MTT1KO+MTT5KD*, and the *MTT5KD* strain.

We compared the gene expression of *MTT1*, *MTT3*, *MTT5* and *MTT2/MTT4* between different *T. thermophila* strains; the SB1969 control strain, the three metal-adapted strains (*Cd-adap*, *Cu-adap* and *Pb-adap*), the three knockout (KO) and/or knockdown (KD) strains described above, and *GFPMTT1* and *GFPMTT5* that over-express *MTT1* or *MTT5*, respectively [36]. *MTT2* and *MTT4* are 98% identical [20] so it is not possible to design specific primers to distinguish them by qRT-PCR. Therefore, we refer to them collectively as *MTT2/4*, because we evaluated the expression of both genes together using primers *MTT2QA* and *MTT2QB* (S1 Table).

Relative fold-induction values for *MTT1* are shown in Fig 2 and S3 Table. *MTT1* responds preferably to  $Cd^{2+}$  in all studied strains and, in general, 24h  $Cd^{2+}$  or  $Pb^{2+}$  exposures result in higher relative induction than 1h. However, the opposite effect is observed for  $Cu^{2+}$ , which induces a stronger *MTT1* induction after 1h than after 24h (Fig 2). Moreover, in *Cd-adap* and *Pb-adap* strains, *MTT1* induction of MTC cultures were higher than those after 1 or 24h treatments. On the other hand, in the *Cu-adap* strain the MTC culture induced *MTT1* less strongly than in cultures treated for 1 or 24h (Fig 2). In general, *MTT1* fold-induction values from control, *GFPMTT1* and *MTT5KD* strains show the following ranking:  $Cd > Pb > Cu$ . For  $Cd$ -

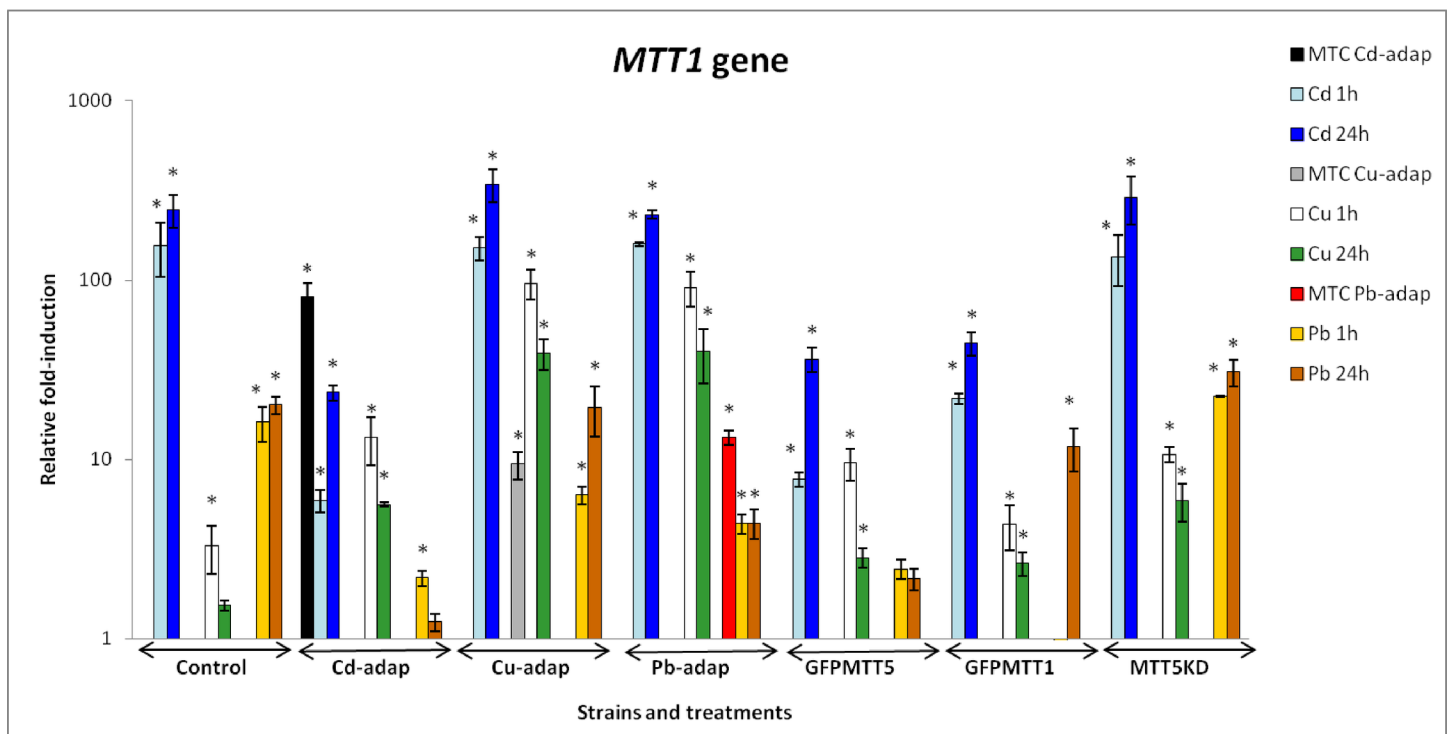

**Fig 2. Comparison of relative fold-induction of *MTT1* in different *T. thermophila* strains.** MTC: maximum tolerated concentration (115  $\mu M$   $Cd^{2+}$ , 4 mM  $Cu^{2+}$  or 5.5 mM  $Pb^{2+}$ ).  $\beta$ -actin was used as the normalizer gene. Each histogram bar represents an average value  $\pm$  standard deviation (see S3 Table) from two or three independent experiments. Relative induction values are represented in a logarithmic scale. Asterisks indicate significant differences from the control with  $p \leq 0.05$ .

<https://doi.org/10.1371/journal.pone.0189076.g002>

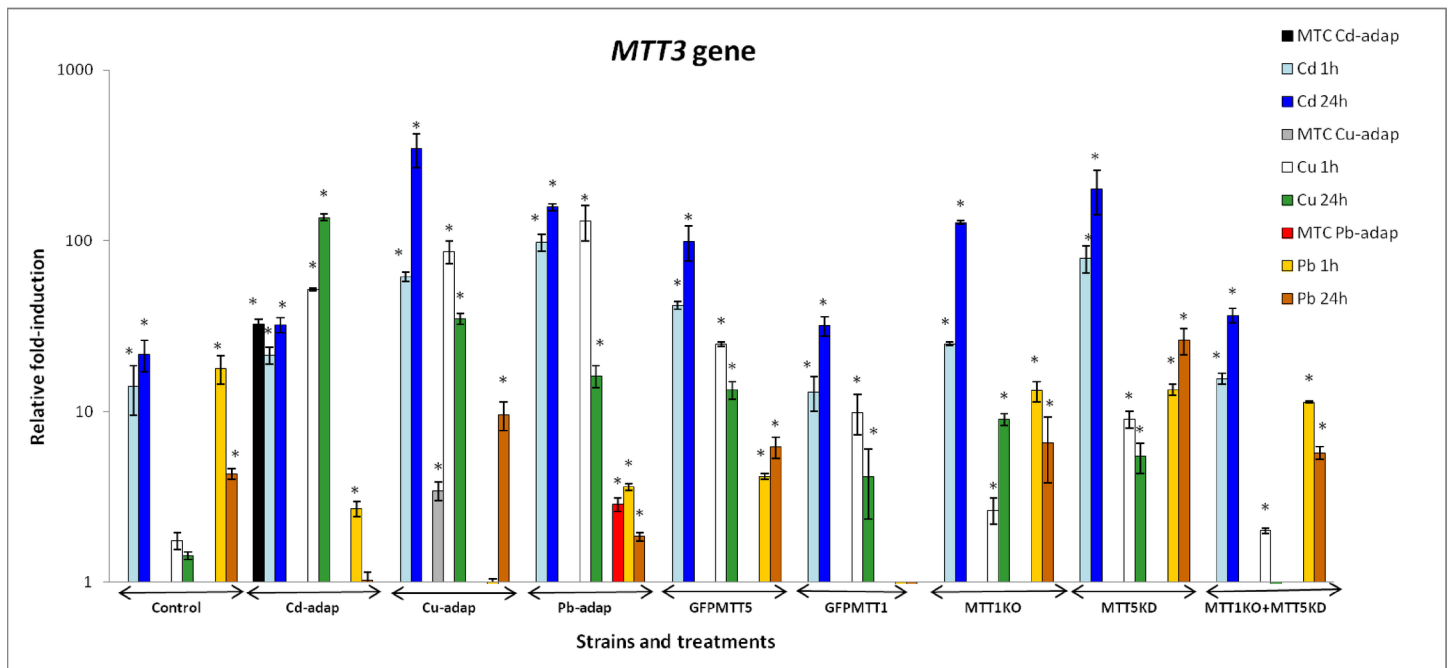

**Fig 3. Comparison of relative fold-induction of *MTT3* in different *T. thermophila* strains.** MTC: maximum tolerated concentration (115  $\mu\text{M}$   $\text{Cd}^{2+}$ , 4 mM  $\text{Cu}^{2+}$  or 5.5 mM  $\text{Pb}^{2+}$ ).  $\beta$ -actin was used as the normalizer gene. Each histogram bar represents an average value  $\pm$  standard deviation (see S3 Table) from two or three independent experiments. Relative induction values are represented in a logarithmic scale. Asterisks indicate significant differences from the control with  $p \leq 0.05$ .

<https://doi.org/10.1371/journal.pone.0189076.g003>

adap, Cu-adap, Pb-adap and GFPMTT5 strains, this ranking changes to:  $\text{Cd} > \text{Cu} > \text{Pb}$  (Fig 2). *MTT1* is not induced (fold-induction  $< 2$ ) in GFPMTT1 after 1h  $\text{Pb}^{2+}$  treatment, but it is induced (around 11-fold) in this strain after 24h treatment at the same  $\text{Pb}^{2+}$  concentration. Likewise, this gene is not induced in control and Cd-adap strains at 24h  $\text{Cu}^{2+}$  or  $\text{Pb}^{2+}$  treatments (Fig 2, S3 Table).

Relative fold-induction for *MTT3* is reported in Fig 3 and S3 Table. Like *MTT1*, *MTT3* preferentially responds to  $\text{Cd}^{2+}$  in almost all strains. The exception is the Cd-adap strain, in which stronger induction occurs after  $\text{Cu}^{2+}$  treatments than after  $\text{Cd}^{2+}$  (Fig 3). In general, 24h  $\text{Cd}^{2+}$  treatments cause higher relative *MTT3* induction than after 1h, while for  $\text{Cu}^{2+}$  or  $\text{Pb}^{2+}$  treatments the highest induction depends on the strain rather than the metal exposure time. In Cd-adap and Pb-adap strains, the induction of *MTT3* in MTC cultures was very similar to that obtained after 1 or 24h. In contrast, in the Cu-adap strain, *MTT3* induction in MTC cultures was lower than after 1 or 24h (Fig 3). In control, MTT1KO, MTT5KD and MTT1KO+MTT5KD strains, *MTT3* shows the following fold-induction ranking:  $\text{Cd} > \text{Pb} > \text{Cu}$ , whereas in Cu-adap, Pb-adap, GFPMTT5 and GFPMTT1 strains the ranking for *MTT3* is:  $\text{Cd} > \text{Cu} > \text{Pb}$ . Finally, for the Cd-adap strain, *MTT3* induction shows the following ranking:  $\text{Cu} > \text{Cd} > \text{Pb}$  (Fig 3). Following 1h of  $\text{Cd}^{2+}$  exposure, *MTT3* gene induction values in MTT1KO and MTT5KD were considerably larger than in control strains ( $\approx 6$ - and  $\approx 9$ -fold, respectively), and the same was true after 24h exposure ( $\approx 6$ - and  $\approx 9$ -fold, respectively). However, in the MTT1KO + MTT5KD strain, *MTT3* maintains similar induction values after  $\text{Cd}^{2+}$  exposures to those seen in control strain (Fig 3, S3 Table). Finally, *MTT3* showed no induction in the following cases: in GFPMTT1 after 1 or 24h  $\text{Pb}^{2+}$  treatment; in the control strain after 1 or 24h  $\text{Cu}^{2+}$  treatments; in the Cd-adap (24h  $\text{Pb}^{2+}$ ); in the Cu-adap (1h  $\text{Pb}^{2+}$ ) and; in the MTT1KO + MTT5KD strain (24h  $\text{Cu}^{2+}$ ) (Fig 3, S3 Table).



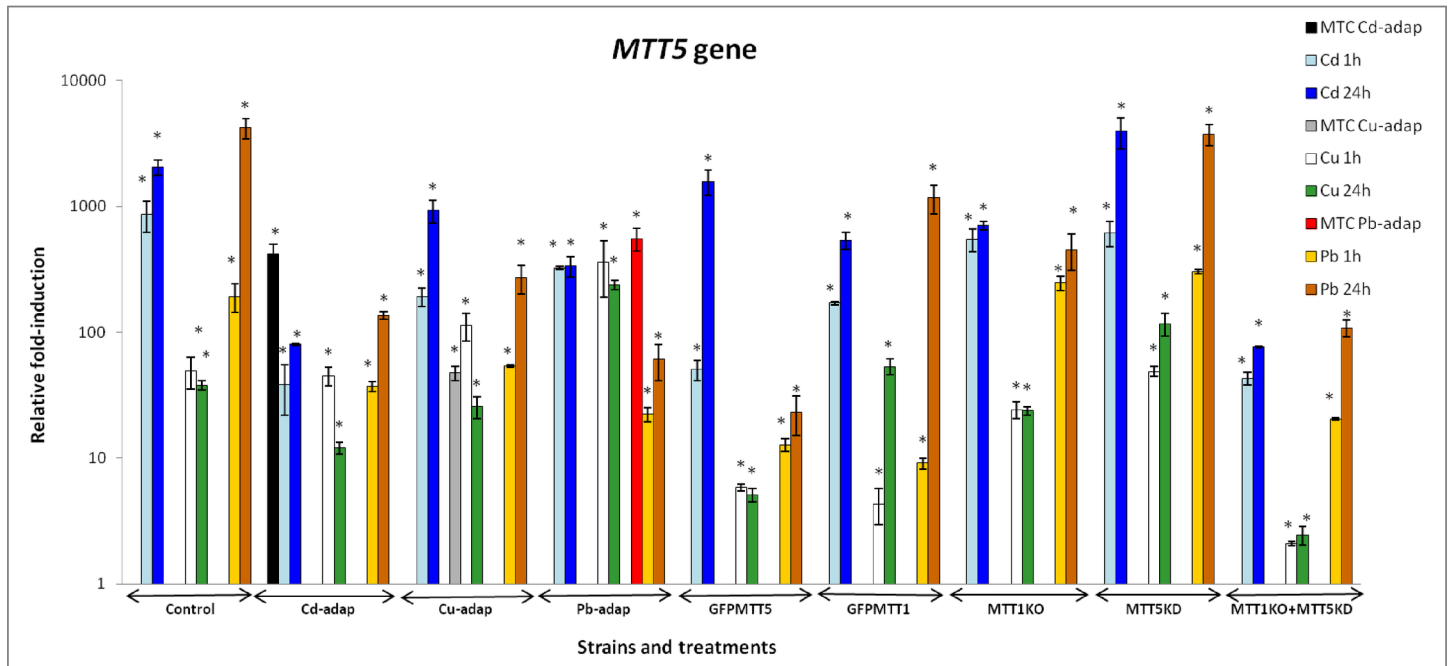

**Fig 4. Comparison of relative fold-induction of *MTT5* in different *T. thermophila* strains.** MTC: maximum tolerated concentration (115  $\mu\text{M}$   $\text{Cd}^{2+}$ , 4 mM  $\text{Cu}^{2+}$  or 5.5 mM  $\text{Pb}^{2+}$ ).  $\beta$ -actin was used as the normalizer gene. Each histogram bar represents an average value  $\pm$  standard deviation (see S3 Table) from two or three independent experiments. Relative induction values are represented in a logarithmic scale. Asterisks indicate significant differences from the control with  $p \leq 0.05$ .

<https://doi.org/10.1371/journal.pone.0189076.g004>

*MTT5* shows the highest fold-induction among the five *T. thermophila* MT genes, independent of the analyzed strain. Unlike *MTT1* and *MTT3*, it is induced under all the assayed metal treatments in all strains (S3 Table). *MTT5* preferentially responds to  $\text{Cd}^{2+}$  and  $\text{Pb}^{2+}$  and shows strongest induction after 24h treatments (Fig 4, S3 Table). In the majority of the strains, the *MTT5* fold-induction ranking is:  $\text{Pb} \geq \text{Cd} > \text{Cu}$ . The exception is the Pb-adap strain, where the ranking is:  $\text{Cd} = \text{Cu} \geq \text{Pb}$  (Fig 4). In metal-adapted strains, the MTC cultures have higher *MTT5* induction values than those reported at 1 or 24h for  $\text{Cd}^{2+}$  and  $\text{Pb}^{2+}$  exposures, while for  $\text{Cu}^{2+}$  treatments the gene induction values in MTC cultures are lower than after 1h treatments. After  $\text{Cd}^{2+}$  treatments (1 or 24h), the MTT1KO and the MTT1KO + MTT5KD strains have lower *MTT5* induction values than the control strain, while these values are higher ( $\approx 2x$ ) in the MTT5KD strain after 24h  $\text{Cd}^{2+}$  treatments, compared to the control strain. After 1h  $\text{Pb}^{2+}$  exposures, MTT1KO and MTT5KD have higher *MTT5* induction values than the control strain, while after 24h  $\text{Pb}^{2+}$  treatments these values are lower (in MTT1KO) or similar (in MTT5KD strain) relative to the control strain (Fig 4, S3 Table).

*MTT2/4* responds most strongly to  $\text{Cu}^{2+}$ , showing the highest fold-induction values after 1h treatment with this metal in all strains (Fig 5). These genes are also significantly induced upon  $\text{Cd}^{2+}$  exposures in most strains, but do not respond to 24h  $\text{Pb}^{2+}$  treatments. Moreover, *MTT2/4* are only significantly induced after 1h  $\text{Pb}^{2+}$  exposures in control, GFPMTT5, MTT1KO, MTT5KD and MTT1KO + MTT5KD strains. In all strains the fold-induction values for *MTT2/4* follow this ranking:  $\text{Cu} > \text{Cd} > \text{Pb}$ . MTT1KO and MTT5KD strains show similar *MTT2/4* induction to the control under  $\text{Cu}^{2+}$  stress. However, the MTT1KO + MTT5KD strain has considerably weaker *MTT2/4* induction than the control strain (S3 Table). *MTT2/4* are not induced in the following strains and treatments: control strain (24h  $\text{Pb}^{2+}$ ); Cd-adap (all  $\text{Cd}^{2+}$  and  $\text{Pb}^{2+}$  exposures); Cu-adap (1 and 24h  $\text{Pb}^{2+}$ ); Pb-adap and GFPMTT1 strains (all  $\text{Pb}^{2+}$  exposures);

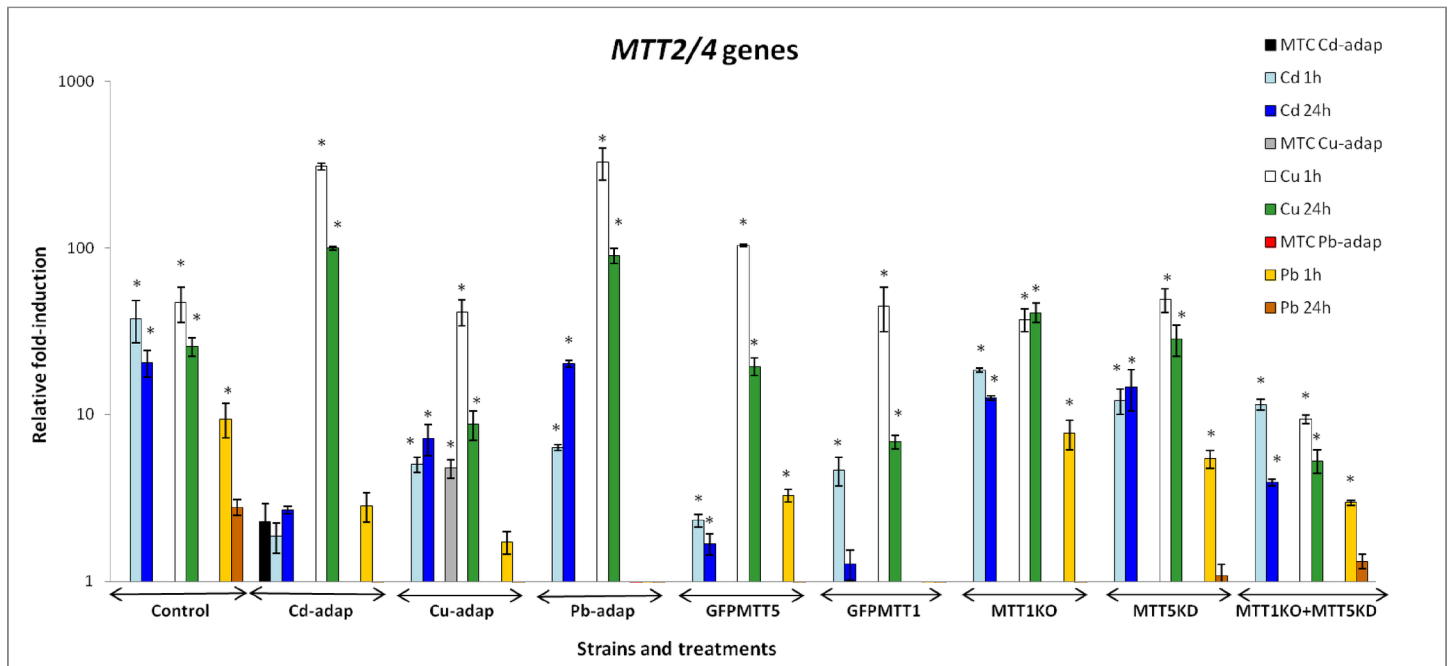

**Fig 5. Comparison of relative fold-induction of *MTT2/4* in different *T. thermophila* strains.** MTC: maximum tolerated concentration (115  $\mu\text{M}$   $\text{Cd}^{2+}$ , 4 mM  $\text{Cu}^{2+}$  or 5.5 mM  $\text{Pb}^{2+}$ ).  $\beta$ -actin was used as the normalizer gene. Each histogram bar represents an average value  $\pm$  standard deviation (see S3 Table) from two or three independent experiments. Relative induction values are represented in a logarithmic scale. Asterisks indicate significant differences from the control with  $p \leq 0.05$ .

<https://doi.org/10.1371/journal.pone.0189076.g005>

GFPMTT5, MTT1KO, MTT5KD and MTT1KO + MTT5KD strains (1h  $\text{Pb}^{2+}$ ). Therefore, *MTT2/4* show the weakest induction among the MT genes, under the conditions tested (Fig 5, S3 Table).

### Comparative MT gene expression analysis of metal-adapted strains from reversible adaptive metal resistance experiments

The three metal-adapted strains, generated as described in Materials and Methods, were transferred and maintained for 1 or 6 months in PP210 without any added metal (indicated as -1M or -6M strains). Afterward, they were again exposed to the MTC of the metal to which they had been adapted, for 1 or 24h, and MT gene induction was measured. The three *T. thermophila* pre-adapted strains were able to survive in the presence of the relevant metal MTC, and no significant cell mortality was detected by microscopy.

Gene induction values are shown in Fig 6. The Cd-adap strain maintained the same ranking of relative gene induction after 1 or 6 months of culture in the absence of  $\text{Cd}^{2+}$ :  $MTT5 > MTT1 > MTT3 > MTT2/4$  (Fig 6A, S3 Table). However, the absolute induction levels in the -1M culture were higher than seen previously, most notably for *MTT5* and *MTT1* (Fig 6A, S3 Table). The fold-induction decreased in the -6M sample, compared to -1M, but remained higher than the induction seen in the founder Cd-adap culture (Fig 6B). For *MTT1*, *MTT3* and *MTT5*, 24h  $\text{Cd}^{2+}$  addition to -1M or -6M cultures generated higher fold-induction values than 1h addition. For *MTT2/4*, the highest expression levels were achieved after 1h  $\text{Cd}^{2+}$  treatments (Fig 6).

For the Cu-adap strain, the induction ranking of the founder culture was  $MTT5 > MTT1 > MTT3 > MTT2/4$ , as described above. This induction ranking changed considerably, after 1 month culture in medium lacking added  $\text{Cu}^{2+}$ , to  $(MTT2/4 > MTT3 > MTT1 > MTT5)$ , and

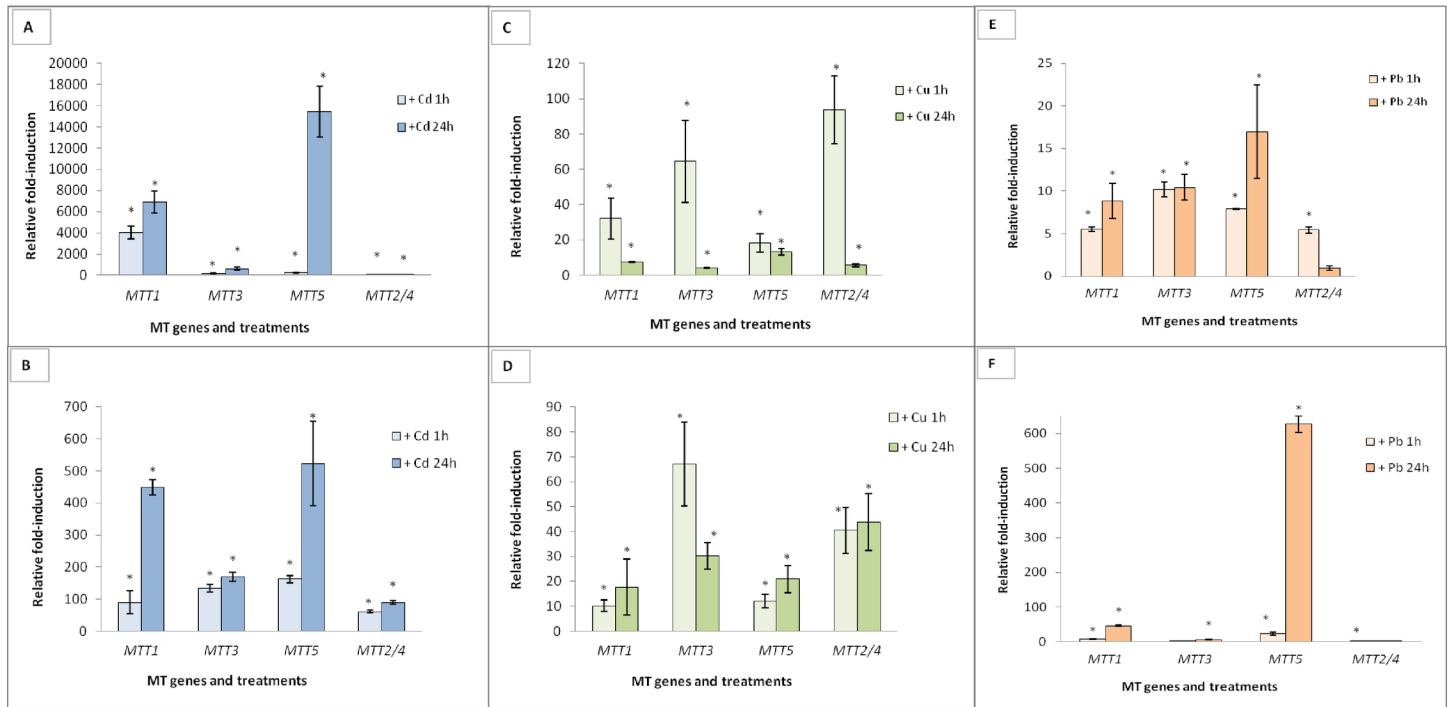

**Fig 6. Relative fold-induction of the five *T. thermophila* MT genes in metal-adapted strains.** These strains were maintained for 1 or 6 months without the metal treatment and then re-exposed (1 or 24h) to the relevant MTC. (A): Cd-adap after 1 month without metal (-1M). (B): Cd-adap after 6 months without metal (-6M). (C): Cu-adap (-1M). (D): Cu-adap (-6M). (E): Pb-adap (-1M). (F): Pb-adap (-6M).  $\beta$ -actin was used as the normalizer gene. Each histogram bar represents an average value  $\pm$  standard deviation (see S3 Table) from two or three independent experiments. Asterisks indicate significant differences from the control with  $p \leq 0.05$ .

<https://doi.org/10.1371/journal.pone.0189076.g006>

again after 6 months to ( $MTT3 > MTT2/4 > MTT5 \approx MTT1$ ) (Fig 6C and 6D). In the Cu-adap (-1M) culture, induction (mainly for  $MTT2/4$  and  $MTT3$ ) is considerably higher after 1h  $Cu^{2+}$  treatments than after 24h  $Cu^{2+}$  or than induction in the founder Cu-adap strain (MTC samples) (Fig 6C, S3 Table). However, the Cu-adap (-6M) culture generally showed stronger induction after 24h treatment than after 1h, the exception being  $MTT3$  (Fig 6D).

For the Pb-adap strain, the induction ranking of the founder culture was  $MTT5 > MTT1 > MTT3 > MTT2/4$ , as described above. The Pb-adap (-1M) and (-6M) strains maintained a very similar induction ranking ( $MTT5 > MTT1 \geq MTT3 > MTT2/4$ ) (Fig 6E and 6F, S3 Table). In the -1M culture,  $MTT1$ ,  $MTT3$  and  $MTT2/4$  induction values were higher than those in the founder culture; however,  $MTT5$  induction was lower than the in the founder (Fig 6E, S3 Table). In the -6M culture,  $MTT5$  was enormously induced after 24h  $Pb^{2+}$  exposure, similar to that seen in the founder culture (S3 Table).  $MTT1$  also responded under these conditions, mainly after 24h  $Pb^{2+}$  exposure, while  $MTT2/4$  and  $MTT3$  showed less induction than in the Pb-adap (-1M) strain (Fig 6E and 6F). In general, 24h treatments resulted in similar or stronger induction compared to induction after 1h metal exposure, for Pb-adap (-1M) and (-6M) cultures (Fig 6E and 6F).

### Comparative analysis of constitutive MT gene expression levels among the different *T. thermophila* strains

*T. thermophila* MT genes show constitutive expression in wildtype cells under non-stressful conditions [20]. For the strains generated in the present study, we compared constitutive (basal) expression levels using the  $C_t$  values obtained in the absence of added metal.

In qPCR (quantitative polymerase chain reaction) or qRT-PCR studies, the threshold is defined as the level of signal that reflects a statistically significant increase over the calculated baseline signal. It is set to distinguish a relevant amplification signal from the background. The threshold cycle ( $C_t$ ) value is the cycle number at which the fluorescent signal of the reaction crosses the threshold, and is inversely related to the amount of starting template. For example, low  $C_t$  values correspond with high levels of transcripts (qRT-PCR templates) or DNA copy number (qPCR templates). The  $C_t$  values corresponding to basal gene expression levels are reported in [S4 Table](#). We used these data to compare basal  $C_t$  values of different MT genes within the same strain ([S5 Table](#)), or of individual MT genes between the different *T. thermophila* strains ([S6 Table](#)). In particular, we calculated  $2^{-(C_{t1}-C_{t2})}$ , where  $C_{t1}$  and  $C_{t2}$  are the  $C_t$  values of two different samples.

As shown in [S4 Table](#) and [S1 Fig](#), *MTT1* has the highest basal expression in most strains (SB1969, Cd-adap, Pb-adap, GFPMTT1, GFPMTT5, MTT5KD, -1M and -6M metal-adapted cultures). *MTT2/4* shows highest basal expression in Cu-adap, Cu-adap (-1M) and MTT1KO strains. *MTT5* shows the highest basal values only in the MTT1KO + MTT5KD and Pb-adap (-1M) culture. Therefore, in general, *MTT5* and *MTT3* have the lowest basal expression, ranked third or fourth in most strains (SB1969, Cd-adap, Cu-adap, Cd-adap (-1M and -6M), Cu-adap (-1M and -6M), GFPMTT1, MTT1KO and MTT5KD) ([S1 Fig](#)).

The MT basal expression ranking in the SB1969 control strain is *MTT1* > *MTT3* > *MTT2/4* > *MTT5*. The absolute level of *MTT1* expression is about 1.6x *MTT3*,  $\approx$  8x *MTT2/4* and  $\approx$  36x *MTT5*. For *MTT3*, expression is about 5x *MTT2/4* and 22x *MTT5*. *MTT2/4* expression is  $\approx$  4x *MTT5* ([S5 Table](#)). In the Cd-adap strain, *MTT1*  $\approx$  30x *MTT3*,  $\approx$  68x *MTT5* and  $\approx$  118x *MTT2/4*, while *MTT3*  $\approx$  2x *MTT5* and  $\approx$  4x *MTT2/4*. *MTT5* expression  $\approx$  2x *MTT2/4* ([S5 Table](#)). While *MTT1* in this Cd-adap culture, like in the control strain, shows the highest basal expression, the differences between basal expression levels of *MTT1* vs the other MT genes are greater in the adapted culture: 2-fold for *MTT5*,  $\approx$  15-fold for *MTT2/4*, and  $\approx$  19-fold for *MTT3* ([S5 Table](#)). *MTT2/4* showed highest basal expression levels in the Cu-adap strain, being  $\approx$  27x *MTT5* and 16x *MTT3*. For the Cu-adap (-1M) culture, *MTT2/4* =  $\approx$  11x *MTT5* and 6.5x *MTT3* ([S5 Table](#)). *MTT1* and *MTT2/4* show similar high basal expression. The ranking of relative expression levels is modified in the Cu-adap (-6M) culture: *MTT1* > *MTT2/4* > *MTT5* > *MTT3* ([S1 Fig](#), [S5 Table](#)). *MTT1* is ranked first for basal expression in the Pb-adap and Pb-adap (-6M) cultures, but this gene is ranked second in the Pb-adap (-1M) culture (*MTT5* > *MTT1* > *MTT2/4* > *MTT3*) ([S1 Fig](#), [S5 Table](#)).

In the GFPMTT1 and GFPMTT5 strains, *MTT1* also shows the highest basal expression levels, with the following rank: *MTT1*  $\approx$  35x *MTT5* and 4x *MTT3* in GFPMTT1 and  $\approx$  3x *MTT5* and 22x *MTT3* in GFPMTT5 ([S5 Table](#)). This last ratio (*MTT1* vs. *MTT3*) is considerably higher than that in SB1969 ([S5 Table](#)). In MTT1KO and MTT1KO + MTT5KD strains, *MTT2/4* and *MTT5* (respectively) show the highest basal expression levels ([S1 Fig](#)). The ranking in MTT1KO is *MTT2/4*  $\approx$  4x *MTT5*. For MTT1KO + MTT5KD, the ranking is *MTT5*  $\approx$  6x *MTT3* and *MTT2/4*  $\approx$  4.6x *MTT3* ([S5 Table](#)). For MTT5KD, *MTT1* has the highest basal expression level, and *MTT1*  $\approx$  2x *MTT5* and 34x *MTT3* ([S5 Table](#)).

Overall, the highest basal expression for *MTT1* and *MTT3* are in the Cd-adap culture, while *MTT2/4* are expressed most strongly in the Cu-adap culture. *MTT5* is most strongly expressed in GFPMTT5 ([S6 Table](#)). We also compared the basal expression levels to those in the control strain. *MTT2/4* expression levels are considerably increased in GFPMTT1 ( $\approx$  7x control). In GFPMTT5, the basal expression levels of *MTT5* is increased  $\approx$  64x compared to the control strain, and the corresponding increases for *MTT1*  $\approx$  4.5x, and for *MTT2/4*  $\approx$  6.5x ([S6 Table](#)).

Similarly, in the metal-adapted cultures *MTT1* and *MTT5* genes show increased basal expression;  $\approx$  28x and 15x, respectively, in the Cd-adap strain, while *MTT2/4* basal expression

is augmented  $\approx 17.5x$  in Cu-adap strain. *MTT5* shows increased basal expression in the Pb-adap strain ( $\approx 7.5x$ ) (S6 Table).

Several changes occurred in basal expression of the metal-adapted strains after they were maintained for 1 or 6 months without added metal. *MTT1* expression returned to the level of the control strain in the Cd-adap (-1M) culture, but the same cells maintained higher basal expression of *MTT2/4* ( $\approx 4x$ ) and *MTT5* ( $\approx 6x$ ) relative to the control. This higher *MTT5* basal expression is also maintained in the Cd-adap (-6M) strain (S6 Table).

*MTT2/4* basal expression was considerably reduced in the Cu-adap (-1M) culture, but are nonetheless still higher ( $\approx 4x$ ) compared to the control strain. *MTT2/4* expression returned to control levels in the Cu-adap (-6M) strain, but there was an increase in *MTT5* basal expression ( $\approx 8.5x$ ) (S6 Table). *MTT5* basal expression increased more dramatically in Pb-adap (-1M) and (-6M), to  $\approx 168x$  and  $21x$  the control strain levels (S6 Table). Finally, the *MTT1KO* and *MTT1KO* + *MTT5KD* strains both showed increased basal expression compared to the control strain of *MTT5* ( $\approx 8.5x$  and  $\approx 60x$ , respectively) and *MTT2/4* ( $\approx 8x$  and  $\approx 10x$ , respectively) (S6 Table). The basal expression ranking in *MTT5KD* was similar to that of *GFPMTT1* (S1 Fig).

## Discussion

In the work described in this manuscript, we have focused on a set of unanswered questions regarding the regulation and specific functions of the individual *T. thermophila* MT isoforms. By comparing *T. thermophila* MT gene expression under different metal stresses and using the metal-adapted (Cd-adap, Cu-adap and Pb-adap), knockout and/or knockdown (*MTT1KO*, *MTT5KD* and *MTT1* + *MTT5KD*) and other strains (SB1969 control, *GFPMTT1* and *GFPMTT5*), we obtained a better understanding of the specific roles of each MT isoform.

One approach we have taken is to adapt *Tetrahymena* cultures over extended periods to high metal concentrations. Such adaptation programs, in which organisms are increasingly exposed to a specific external stress, can reveal the cellular mechanisms and pathways that underlie the normal stress response. In such an experimental evolution experiment, the continuous adaptation to a specific stress can serve to magnify and reveal cellular efforts to counteract any harmful effects. One mechanism of adaptation is modulation of gene expression ("gene expression plasticity"), which can produce new adaptive phenotypes in the face of a specific stress [40].

In our experiments, different *T. thermophila* cultures were cultured in the presence of increasing metal ( $Cd^{2+}$ ,  $Cu^{2+}$  or  $Pb^{2+}$ ) concentrations. We could thus define a maximum tolerated concentration (MTC). These MTC values were considerably higher than the corresponding  $LC_{50}$  values in this species previously determined for each metal [20]. The relative increase in MTC values (i.e., between the adapted vs non adapted cultures) was inversely correlated with the toxicity of the specific metals:  $Cu^{2+}$  ( $\approx 12.7x$ ) >  $Pb^{2+}$  ( $\approx 5.7x$ ) >  $Cd^{2+}$  ( $\approx 2.5x$ ). We studied cultures that were maintained at their respective MTCs (Cd-adap, Cu-adap or Pb-adap) for extended periods.

### The *MTT1* isoform: A gene with a relevant and still unknown constitutive function

*MTT1* is most strongly induced by  $Cd^{2+}$  in all strains, as previously reported in the wild-type [20]. In addition, the *MTT1* protein showed the highest affinity for  $Cd^{2+}$  among the *T. thermophila* CdMTs [27]. However, *MTT1* also responded to  $Cu^{2+}$  or  $Pb^{2+}$ , with different expression patterns depending on the metal. With  $Cd^{2+}$  or  $Pb^{2+}$ , *MTT1* was induced by 1h but the highest induction values were achieved after 24h. With  $Cu^{2+}$ , the highest *MTT1* induction occurred

after 1h. A difference in induction by  $\text{Cd}^{2+}/\text{Pb}^{2+}$  vs  $\text{Cu}^{2+}$  was also observed in the metal-adapted strains. Both Cd-adap and Pb-adap strains showed strongest *MTT1* induction under continuous exposure to the MTC, corroborating that the persistent presence of these metals is required to maintain highest *MTT1* expression. In contrast, the strongest *MTT1* induction in the Cu-adap strain occurred after growth for 24h without any added metal, and then re-exposing the cells to  $\text{Cu}^{2+}$  for 1h.

Among the *T. thermophila* MT proteins, MTT1 shows the lowest affinity for  $\text{Cu}^{2+}$  [27] and the *MTT1* gene shows weakest induction by this metal. Unlike  $\text{Cd}^{2+}$  or  $\text{Pb}^{2+}$ ,  $\text{Cu}^{2+}$  is an essential metal and is comparatively less toxic, which may account for the difference in the *MTT1* transcriptional response to this metal. *MTT1* expression occurred soon after exposure to  $\text{Cu}^{2+}$ , and then decreased over time. In contrast, the induction in response to  $\text{Cd}^{2+}$  or  $\text{Pb}^{2+}$  was more persistent. These metals may be increasingly toxic with long exposure, and therefore require more prolonged strong *MTT1* induction. A similar disparity between the effects of  $\text{Cd}^{2+}$  or  $\text{Cu}^{2+}$  stress on transcription was reported for *MTT3*, *MTT5* and *MTT2/4*, as well as on MT gene transcription of other *Tetrahymena* species [6]. In general, two different MT gene expression patterns can be distinguished in *Tetrahymena*. In response to  $\text{Cu}^{2+}$ , the high initial transcript levels subsequently decrease over time. In contrast, the transcriptional response to  $\text{Cd}^{2+}$  or  $\text{Pb}^{2+}$  increases over time. These differences in the transcriptional responses are correlated with the essential vs. non-essential nature of the metals, and their levels of toxicity, but the underlying molecular or physiological mechanisms are not yet known.

*MTT1* constitutive expression differed significantly between strains, with the following relative ranking: Cd-adap > GFPMTT5 > GFPMTT1 > Control strain > Cu-adap  $\approx$  Pb-adap > MTT5KD. Compared to the control, expression was  $\approx$  28x higher in Cd-adap,  $\approx$  5x higher in GFPMTT5 and 2x higher in GFPMTT1. This is probably the reason why *MTT1* gene induction levels in the GFPMTT1 strain were not higher than those in the control strain (Fig 2). Based on these results, we can conclude the following points. First, Cd-adaptation involves an increase of basal *MTT1* expression. Similar phenomena have been reported in other organisms. For instance, an increase in constitutive MT expression plays an important function when the arthropod *Orchesella cincta* is chronically exposed to  $\text{Cd}^{2+}$  [41]. Likewise, in the domestic fly (*Musca domestica*), a cytochrome P450 isoform that confers insecticide resistance shows 9-fold higher constitutive expression in a resistant strain compared to a non-resistant one [42]. In some freshwater snail species, like *Biomphalaria glabrata*, constitutive expression of a MT gene seems to confer tolerance to the snails against  $\text{Cd}^{2+}$  exposure [43].

GFPMTT1 contains multiple copies of the recombinant plasmid pVGFMTT1 with the construct  $P_{MTT1}::\text{GFP}::\text{MTT1}$  (complete *MTT1* ORF under its own *MTT1* promoter) [36]. Therefore, *MTT1* is over-expressed, including the expected increase in basal expression. In GFPMTT5, *MTT5* is driven by the *MTT1* promoter and its constitutive expression levels are  $\approx$  49x higher than in the control. The *MTT1* promoter driving the heterologous construct is more active under basal conditions than the endogenous *MTT5* promoter, accounting for the observed increase in *MTT5* basal expression. Interestingly, *MTT1* basal expression is also considerably higher in this strain compared to the wildtype ( $\approx$  5x) and to the GFPMTT1 strain ( $\approx$  2x). In conclusion, Cd-adap, GFPMTT1 and GFPMTT5 show increased *MTT1* basal expression. This increase can be explained by a greater *MTT1* copy number in GFPMTT1, and this may also be true in the Cd-adap strain (unreported results).

In GFPMTT5, the increase of *MTT1* basal expression may be due to higher *MTT5* basal expression driven by the *MTT1* promoter. This can be explained if basal expression is coordinated between MT genes, in this case *MTT1* and *MTT5*. Van Straalen et al. [44] have pointed out that both *cis* and *trans*-regulatory mechanisms can contribute, in a combinatorial fashion, to adaptive evolution in response to a stress. We detected more hints of coordinated gene

regulation in the knockout (KO) and/or knockdown (KD) strains. MTT1KO and MTT1KO + MTT5KD, lacking all copies of *MTT1*, show increased *MTT5* basal expression ( $\approx 8.5$ x control for MTT1KO and  $\approx 59$ x for MTT1KO + MTT5KD). *MTT5* may be upregulated to compensate for the absent *MTT1* activity in these strains. It appears that while *MTT1* is not essential, its activity is important in stress but also non-stress conditions, where basal expression may contribute to cellular homeostasis. Consistent with this idea, basal *MTT1* expression is the highest among the MT isoforms in all strains except the Cu-adap culture (S5 Table). The ranking of MT basal expression in GFPMTT1 is  $MTT1 > MTT2/4 > MTT3 > MTT5$ , which is very similar to the control ( $MTT1 > MTT3 > MTT2/4 > MTT5$ ). However, in the GFPMTT5 strain, *MTT5* is second in basal expression ( $MTT1 > MTT5 > MTT2/4 > MTT3$ ), and a similar ranking was found for the Pb-adap strain ( $MTT1 > MTT5 > MTT2/4 > MTT3$ ) (Fig 7, S5 Table).

### The *MTT5* isoform: An essential "alarm" MT gene

Based on previous studies, *MTT5* was considered the main MT gene involved in metal detoxification [5, 26]. This protein represents one of the best Cd-thionein after MTT1 due to its high affinity for this metal cation [27]. These conclusions are extended by our present results. *MTT5* is the most strongly induced MT gene for any metal treatment and in all strains. The consensus MT gene induction pattern following exposure to  $Cd^{2+}$  or  $Pb^{2+}$  is  $MTT5 > MTT1 / MTT3 > MTT2/4$  (Fig 7). This includes MTT5KD which has a considerably reduced *MTT5* copy number (unreported results). Moreover, although the *MTT5* gene product has a low affinity for  $Cu^{2+}$  [27], it is the most highly induced MT following  $Cu^{2+}$  treatment in three strains (Cu-adap, Pb-adap and MTT5KD) (Fig 7). This strong induction under different metal stress treatments may be explained by the presence of a 416 bp duplicated sequence in its promoter region [20], which includes more putative binding sites for AP-1 transcription factors than are found in other *T. thermophila* MT isoforms [5, 6, 20, 26].

Basal expression of *MTT5* is much lower than that of other MTs in several strains (control, Cu-adap, GFPMTT1, MTT1KO and MTT5KD) (Fig 7). In SB1969, basal expression of *MTT1*, *MTT3* and *MTT2/4* are  $\approx 36$ x, 23x, and 4x the expression of *MTT5*, respectively. In Cd-adap and Pb-adap strains, *MTT5* is ranked third and second in basal expression, respectively (Fig 7). However, *MTT5* is the most highly expressed MT in the MTT1KO + MTT5KD strain, where *MTT1* is absent and *MTT5* gene copy number is drastically reduced (Fig 7). Basal *MTT5* expression in MTT1KO is  $\approx 1,000$ x that in the MTT5KD strain, a difference which is due to the reduced *MTT5* copy number in MTT5KD and likely compensation in MTT1KO for the absence of *MTT1*. Taken together, our data suggest that the balance of the *MTT5* and *MTT1* activities may regulate the expression of both genes.

Unlike *MTT1*, which shows high basal expression, *MTT5* does not seem to be required in non-stress conditions, judging by its low basal expression. Expression increases very quickly, to high levels, under stress conditions. In this sense, *MTT5* might be considered an "alarm" MT gene, while at the same time it is essential for cell viability. As an essential gene, *MTT5* may be required to induce other MT isoforms (e.g., MTT1 or MTT2/4), which may be needed depending on the specific stressor and the total available MT pool. GFPMTT5 shows  $\approx 49$ -fold increased basal expression for this "alarm" MT gene. This might be interpreted by these cells as a stress situation, accounting for the increased expression of other MTs: a  $\approx 5$ x increase for *MTT1* and  $\approx 6.5$ x increase for *MTT2/4*. The MTT1KO + MTT5KD strain must respond to a distinct genetic stress: loss of *MTT1* and drastically reduced *MTT5* copy number. Facing this situation, this strain shows  $\approx 59$ x over-expression of *MTT5* and  $\approx 10$ x over-expression of *MTT2/4*. These results are consistent with the idea that expression of *T. thermophila* MT genes is coordinated in response to a stress situation.

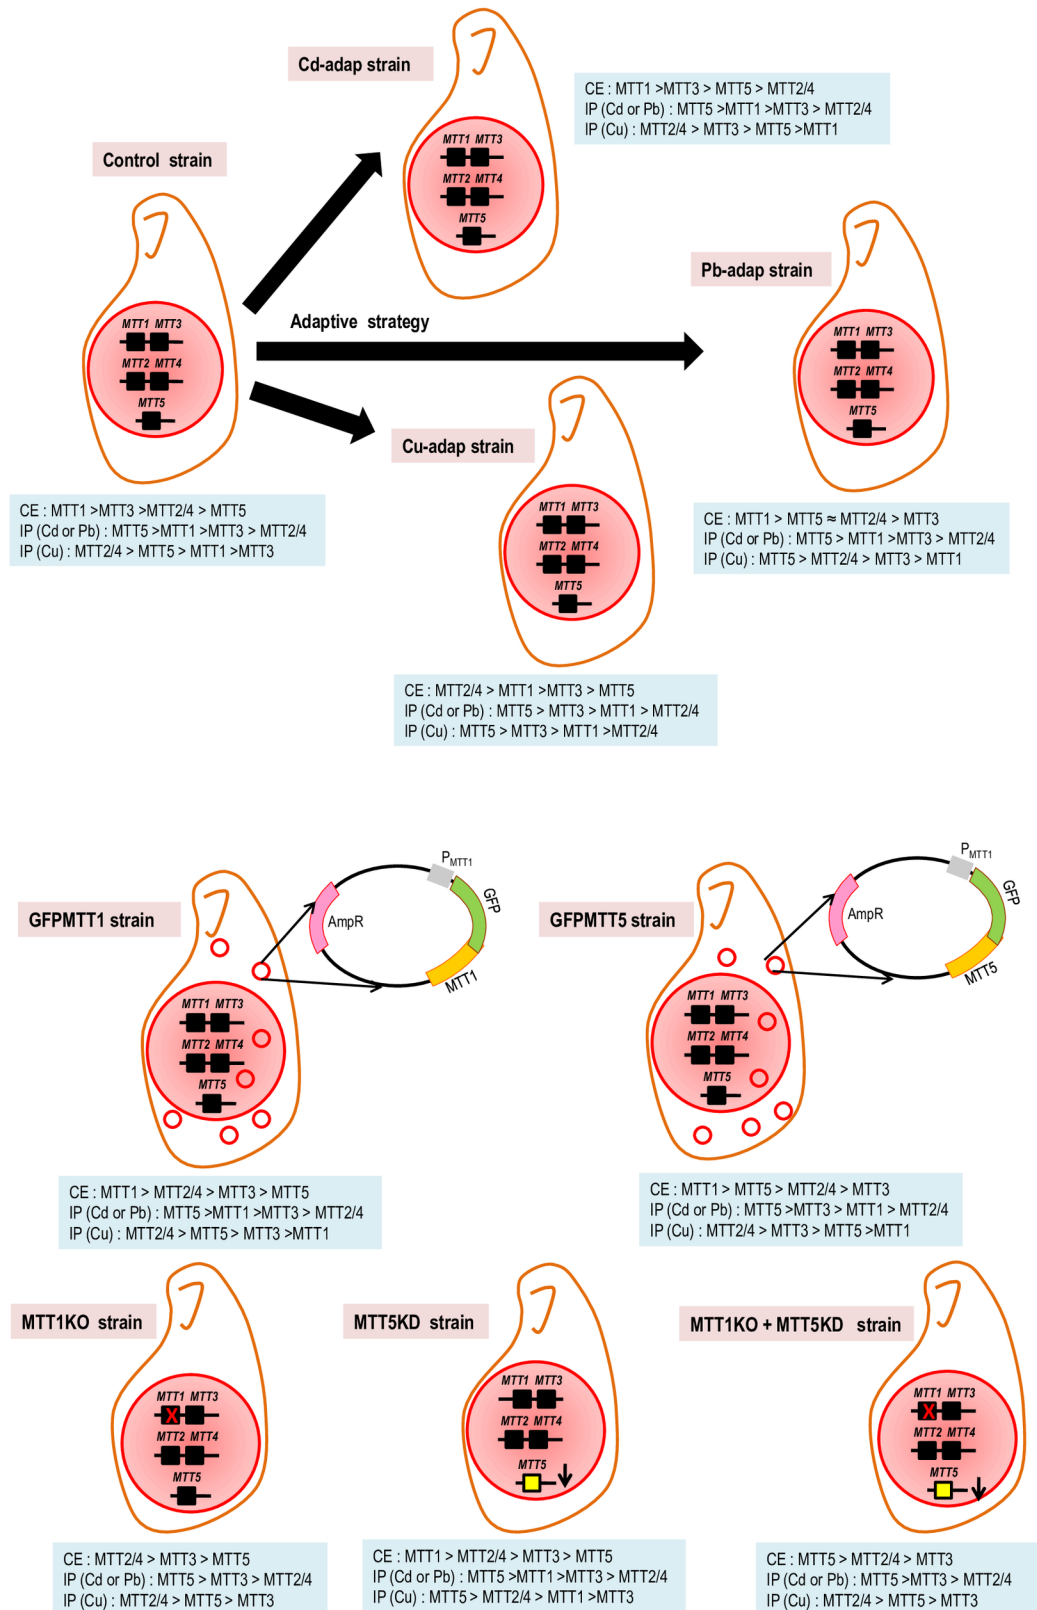

**Fig 7. Schematic representation of the genomic characteristics and the MT gene expression levels from the different *T. thermophila* strains used in this study.** The constitutive MT gene expression ranking (CE) and the MT gene induction patterns (IP) obtained under Cd<sup>2+</sup>/ Pb<sup>2+</sup> or Cu<sup>2+</sup> treatments are shown for each strain.

<https://doi.org/10.1371/journal.pone.0189076.g007>



*MTT5* is essential for *T. thermophila* viability, in contrast with all MT genes described in a variety of other organisms that appear to be non-essential. For example, *Caenorhabditis elegans* nematodes with knockouts of either of the two MT genes, as well as with both genes disrupted, are still viable [45]. Mice with MT knockouts show normal development and reproduction, but are more vulnerable to oxidative stress [15, 46]. Similarly, knockout strains for all four *Drosophila melanogaster* MT genes are viable but are hypersensitive to  $\text{Cu}^{2+}$ ,  $\text{Cd}^{2+}$  or  $\text{Zn}^{2+}$  [47].

In *T. thermophila*, *MTT5* may also have a key role in  $\text{Pb}^{2+}$  detoxification and adaptation processes. The Pb-affinity of *MTT5* has not been determined, but the induction of *MTT5* at 24h  $\text{Pb}^{2+}$  in the majority of strains is higher than that of other MT isoforms. In addition, basal *MTT5* expression in the Pb-adap strain is increased about 7-fold relative to the control. After 6 months culturing without  $\text{Pb}^{2+}$ , re-exposure for 24h to the  $\text{Pb}^{2+}$  MTC resulted in higher fold-induction of *MTT5* than of the other MTs.

### The *MTT3* isoform: A still little defined MT

*MTT3* is located adjacent to *MTT1* (at 1.7 Kb) on the same macronuclear chromosome and with the same orientation. The two genes (486 bp in length, 85% nucleotide sequence identity) encode similar polypeptides (76% amino acid identity) and they probably originated by paralogous duplication [5, 20, 26]. The sequence changes may have resulted in drastic changes in their metal binding abilities and functions. Moreover, variations in their promoter regions and in their *cis*-regulatory motifs correlate with their differential expression, which may have been an early step in their functional divergence [48]. One difference between their promoter regions is the different number of putative binding sites for AP-1 transcription factors: the *MTT1* promoter contains 6 putative binding sites while the *MTT3* promoter has only 2 [20]. This difference may contribute to the lower gene expression levels of *MTT3* with respect to *MTT1* or *MTT5*, which has 13 putative AP-1 binding sites [6, 26].

*MTT3* is classified as a CdMT because its pattern of Cys residues is very similar to that of other *Tetrahymena* CdMTs [5, 6, 26]. Its expression is mainly induced by  $\text{Cd}^{2+}$  (after 24h treatments) in almost all strains. However, it is also strongly induced by  $\text{Cu}^{2+}$  (after 1 or 24h treatment) in the metal-adapted strains, as well as in the Cu-adap (-1M) and (-6M) strains re-exposed to the  $\text{Cu}^{2+}$  MTC for 1h. *MTT3* basal expression is quite low, ranked 2<sup>nd</sup> or 3<sup>rd</sup> depending on the strain. In the *MTT5*KD, basal *MTT3* expression was lower than that of the other strains (e.g., 42-fold lower than the control). Although *MTT3* has previously been classified as a CdMT and part of the *Tetrahymena* 7a subfamily [6, 20], we would now argue that it may be specialized for  $\text{Cd}^{2+}$  or  $\text{Cu}^{2+}$ , and may not in fact be particularly well-suited for the coordination of  $\text{Cd}^{2+}$  [27]. Therefore, the specificity of this MT still remains to be fully defined [27]. The lack of a strong metal preference may provide plasticity that allows *MTT3* to perform diverse physiological roles, binding  $\text{Cd}^{2+}$ ,  $\text{Cu}^{2+}$  and/or  $\text{Zn}^{2+}$  depending on the environment [27].

Unlike any of the other *T. thermophila* CdMTs, the *MTT3* protein sequence includes 2 histidine residues, while a single histidine is found in a MT from *T. patula* [6]. Histidines enhance, through their imidazole rings, the affinity for  $\text{Zn}^{2+}$  in comparison with  $\text{Cd}^{2+}$ . Histidines are the most frequent  $\text{Zn}^{2+}$ -liganded residues in metalloenzymes [49] and they stabilize the formation of metal-protein complexes in MT proteins [50]. As previously reported, *MTT3* is most strongly induced after  $\text{Zn}^{2+}$  treatment (1h) [20]. Therefore, this gene may play a role in intracellular homeostasis of essential metals,  $\text{Zn}^{2+}$  and/or  $\text{Cu}^{2+}$ .

### The *MTT2/4* isoforms: Two better than one

*MTT2* and *MTT4*, which are tandemly clustered in the right arm of the micronuclear chromosome 4, share 98% identity at the nucleotide level and 99% at the amino acid level. Their

promoter regions are also quite similar (76% identity) and each bears two putative binding motifs for AP-1 transcription factors [6]. Following the duplication that gave rise to the gene pair, there appears to have been little diversification. We do not yet know if the genes are differentially expressed or if both copies are jointly expressed, an increase in gene dosage that could enhance the cellular stress response to metals. Neither seems to be a pseudogene, and the *MTT2* upstream region functions as a copper-inducible promoter [51].

*MTT2* and *MTT4* isoforms are clearly CuMTs as they show highest affinity to copper ( $MTT2 > MTT4$ ) among all *T. thermophila* MT isoforms, and moreover do not form stable complexes with  $Cd^{2+}$  [27]. In almost all the *T. thermophila* strains, *MTT2/4* expression is preferentially induced by  $Cu^{2+}$ , mainly after 1h exposure. The consensus ranking for induction following  $Cu^{2+}$  stress is  $MTT2/4 > MTT5 \approx MTT3 > MTT1$ . An exception is found in the Cu-adapted strain, in which *MTT2/4* genes are ranked last in induction (Fig 7). This is explained by the very high basal expression of *MTT2/4* in that culture compared to the other MT genes: *MTT2/4* basal expression is 4 times higher than *MTT1*,  $\approx 16x$  *MTT3* and  $\approx 27x$  *MTT5*. This elevated *MTT2/4* basal expression may obviate the need to further induce *MTT2/4* upon  $Cu^{2+}$  stress. Our results suggest that *MTT2/4* may play a key role in Cu-adaptation.

*MTT2/4* basal expression considerably increases in the KO and/or KD strains. In *MTT1*KO, *MTT2/4* basal expression levels are increased  $\approx 8$ -fold. In *MTT1*KO+*MTT5*KD, the basal expression is increased about 10-fold compared to the control, or 5-fold compared to *MTT5*KD. These results support the idea of coordinated regulation of MT genes that may include *MTT1*, *MTT5* and *MTT2/4*. In this way, higher *MTT1* basal expression in GFP*MTT1* ( $\approx 2x$ ) may be linked to higher *MTT2/4* basal expression ( $\approx 7x$ ). Likewise, in GFP*MTT5*, increased *MTT5* basal expression ( $\approx 49x$ ) may upregulate basal expression of *MTT1* ( $\approx 5x$ ) and *MTT2/4* ( $\approx 6x$ ).

Overall, our results obtained with *T. thermophila* strains and particularly with metal-adapted strains clearly indicate differential roles for the *T. thermophila* MT isoforms. Similarly, the four MT isoforms in *Drosophila melanogaster* do not contribute equally to metal detoxification [52]. Most simply, MT functional differentiation can be due to both differential gene expression and to differences in metal binding specificities. We found evidence for inter-connected transcriptional co-regulation of the *T. thermophila* MT genes, particularly *MTT1*, *MTT5* and *MTT2/4*. One possibility is that the genes share *trans*-acting regulatory factors, which may be directly or indirectly controlled by the MTs themselves, leading to activation or repression of MT gene expression. In recent years, the traditional view that MTs are exclusively involved in metal detoxification is being replaced by the idea that they are dynamically involved in a range of phenomena including gene regulation, neurotransmission, control of neurodegenerative and neoplastic disorders, and tumor progression [53]. These functions may depend upon the roles of MTs in pathways including intracellular transport, signaling, essential metal homeostasis, enzymatic and transcriptional regulation, as well as metal detoxification [53]. These roles may depend on the formation of protein complexes that include MTs. Mammalian MTs have been reported to directly interact with proteins including Rab3A GTPase [54], LPR-receptors [55], bovine serum albumin [56] and p53 and NF- $\kappa$ B transcription factors [57]. Moreover, MTs can also interact indirectly with other proteins, swapping essential ions (Zn, Cu or Fe) with proteins including ferritin [58], Zn-dependent enzymes [59] and Zn-finger transcription factors [60, 61].

Finally, it is important to note that MTs are not uniquely responsible for metal detoxification. Other cellular mechanisms are involved in the stress response, such as active transport by metal efflux-pumps. Interestingly, the *T. thermophila* genome includes 485 genes that encode putative membrane transporters for inorganic cations [62], and some may have important functions in metal detoxification.

## Conclusions

1- After carrying out a comparative MT gene expression analysis using different *T. thermophila* strains, we can distinguish differential roles among the five MT isoforms of this ciliate. a)- *MTT1* protein is the *T. thermophila* MT with the highest affinity for  $\text{Cd}^{2+}$ , and *MTT1* is primarily induced by  $\text{Cd}^{2+}$ . Under no-stress conditions, *MTT1* shows the highest basal expression in all strains except for the Cu-adap. It can be considered as a MT gene probably involved in metal cell homeostasis, but also with an important detoxification role, because it is ranked second or third in the consensus pattern of MT gene expression induction under  $\text{Cd}^{2+}$  or  $\text{Pb}^{2+}$  stress. This gene is not essential, but cells lacking *MTT1* show higher sensitivity to  $\text{Cd}^{2+}$ . b)- *MTT5* basal expression is the lowest in several of the *T. thermophila* strains. However, under metal stress, it is the MT gene with the highest induction. When *MTT5* is induced, the rest of the MT gene isoforms are over-expressed as well, suggesting that there may be coordination between the *MTT5* product and induction of other MT genes under metal stress. *MTT5* might be considered as an "alarm" MT gene, that is over-expressed under metal stress (mainly  $\text{Cd}^{2+}$  or  $\text{Pb}^{2+}$ ) and promotes the expression of other MT genes. *MTT5* is essential because it was not possible to isolate a stable knockout strain. Therefore, this is the first time that a MT gene appears to be essential. c)- *MTT3* is preferably induced by  $\text{Cd}^{2+}$  and  $\text{Cu}^{2+}$  and the protein has an ambiguous affinity for these two metals. We consider it to be an "undefined" MT [27] and the lack of a specific metal preference may maintain plasticity, allowing it to develop diverse physiological roles, binding  $\text{Cd}^{2+}$ ,  $\text{Cu}^{2+}$  or  $\text{Zn}^{2+}$  depending on the environmental conditions. In addition, a possible role for this MT isoform could be the intracellular homeostasis of essential metals. d)- *MTT2* and *MTT4* are almost identical and they encode CuMTs with high affinity to  $\text{Cu}^{2+}$ . Moreover, these genes are over-expressed under  $\text{Cu}^{2+}$  treatments in almost all strains. A significant increase in basal *MTT2/4* expression is detected in the Cu-adap, as well as when some other MT genes have been disrupted or knocked down. The maintenance of two nearly identical genes may represent an adaptation to increase the total levels of cytoplasmic CuMTs.

2- *T. thermophila* MT genes (primarily *MTT1*, *MTT5* and *MTT2/4*) may be connected in a transcriptional regulatory network. The details of this putative network are unknown but may involve interactions between AP-1 transcription factors, metal ions and MT proteins.

3- Cell adaptation to  $\text{Cd}^{2+}$  leads to up-regulation of *MTT1*, while  $\text{Cu}^{2+}$  or  $\text{Pb}^{2+}$  adaptation involves up-regulation of *MTT2/4* or *MTT5* expression, respectively. This is consistent with the three genes having specific roles in adaptation to different metals.

## Supporting information

**S1 Fig. Ranking of basal expression levels under no-metal conditions for the five *T. thermophila* MT genes.** The predominant consensus pattern is shown.

(TIF)

**S1 Table. Primers used in this study.** (\*): *MTT2QA* and *MTT2QB* primers were used to amplify *MTT2* and *MTT4* CuMT genes indistinctly because both have very similar nucleotide sequences (98% identity) and it was not possible to design specific primers for each of them.

(DOCX)

**S2 Table. Quantitative RT-PCR standard-curve parameters.** (\*): correlation coefficient. Efficiency (E) is calculated from the slope value of the standard curve:  $E = 10^{(-1/\text{slope})-1}$ .

(DOCX)

**S3 Table. MT gene induction values obtained by qRT-PCR after different metal treatments.** (-): Data not obtained. Normalization of the gene expression was carried out using the

$\beta$ -actin as an endogenous control gene. We show the average value  $\pm$  standard deviation of two or three independent experiments. (-1M) or (-6M): metal adapted strains after 1 or 6 months in growth medium without metal exposure.

(DOCX)

**S4 Table. Comparison of the  $C_t$  values obtained in control situations (no metal exposure) from the different *T. thermophila* strains analyzed in the comparative MT gene expression study.**  $\beta$ -actin gene was used as an endogenous control and it was considered a reference for neutralizing the variability of the qPCR technique. (\*)  $C_t$  values that are considerably lower than those obtained in the control SB1969 strain. (-): not applicable, because the MTT1KO and the MTT1KO + MTT5KD strains have lost all the copies of the *MTT1* gene. (-1M) or (-6M): these parameters were calculated after maintaining metal adapted strains 1 or 6 months in growth medium without metal exposure.

(DOCX)

**S5 Table. Comparison of the basal expression levels among different MT gene isoforms in each *T. thermophila* strain.** Differences among basal expression levels for the different MT genes in each *T. thermophila* strain were calculated using the following formula:  $2^{(C_{t1}-C_{t2})}$ , being  $C_{t1}$  and  $C_{t2}$  the  $C_t$  values under a control situation (no metal exposure) between two MT genes in the same strain. We compared in each strain all MT gene basal expression levels by twos, distinguishing them by two colours: red and green. For each comparison, results are indicated in red or green depending on the MT gene that has a higher basal expression level in the same strain. Comparison values higher than 4 ( $C_t$  value differences higher than 2 cycles) are shaded in grey. (-): not applicable. (-1M) or (-6M): these parameters were calculated after maintaining metal adapted strains 1 or 6 months in growth medium without metal exposure.

(DOCX)

**S6 Table. Comparison of the basal expression levels of each MT gene among different *T. thermophila* strains.** Differences among basal expression levels for each MT gene among different *T. thermophila* strains were calculated using the following formula:  $2^{(C_{t1}-C_{t2})}$ , being  $C_{t1}$  and  $C_{t2}$  the  $C_t$  values under a control situation (no metal exposure) for the same MT gene into two different strains. We compared all the *T. thermophila* analyzed strains by twos, distinguishing them by two colours: red and green. For each comparison, results are indicated in red or green depending on the strain that has a higher basal expression level for the same MT gene. Comparison values which are higher than 4 ( $C_t$  value differences higher than 2 cycles) are shaded in grey. (-): not applicable. (-1M) or (-6M): these parameters were calculated after maintaining metal adapted strains 1 or 6 months in growth medium without metal exposure.

(DOCX)

## Acknowledgments

A PhD scholarship was awarded to PdF by the Spanish Ministry of Education (FPU12/02789).

## Author Contributions

**Conceptualization:** Juan Carlos Gutiérrez.

**Funding acquisition:** Juan Carlos Gutiérrez.

**Investigation:** Patricia de Francisco, Ana Martín-González, Aaron P. Turkewitz.

**Supervision:** Juan Carlos Gutiérrez.

**Writing – original draft:** Patricia de Francisco.

**Writing – review & editing:** Aaron P. Turkewitz, Juan Carlos Gutiérrez.

## References

- Gadd GM. Heavy metal pollutants: environmental and biotechnological aspects. In: Lederberg J., editor. Encyclopedia of Microbiology. New York: Academic Press. 2000. pp. 607–617.
- Leonard SS, Harris GK, Shi X. Metal-induced oxidative stress and signal transduction. *Free Radic Biol Med.* 2004; 12: 1921–1942.
- Valko M, Morris H, Cronin MT. Metals, toxicity and oxidative stress. *Curr Med Chem.* 2005; 12: 1161–1208. PMID: [15892631](#)
- Wysocki R, Tamás MJ. How *Saccharomyces cerevisiae* copes with toxic metals and metalloids. *FEMS Microbiol Rev.* 2010; 34: 925–951. <https://doi.org/10.1111/j.1574-6976.2010.00217.x> PMID: [20374295](#)
- Gutiérrez JC, Amaro F, Díaz S, de Francisco P, Cubas LL, Martín-González A. Ciliate metallothioneins: unique microbial eukaryotic heavy-metal-binder molecules. *J Biol Inorg Chem.* 2011; 16: 1025–1034. <https://doi.org/10.1007/s00775-011-0820-9> PMID: [21785894](#)
- De Francisco P, Melgar LM, Díaz S, Martín-González A, Gutiérrez JC. The *Tetrahymena* metallothionein gene family: twenty-one new cDNAs, molecular characterization, phylogenetic study and comparative analysis of the gene expression under different abiotic stressors. *BMC Genomics.* 2016; 17: 1–23. <https://doi.org/10.1186/s12864-015-2294-6>
- Sakulsak N. Metallothionein: An overview on its metal homeostatic regulation in mammals. *Int J Morphol.* 2012; 30: 1007–1012.
- Liu J, Klaassen CD. Absorption and distribution of cadmium in metallothionein-I transgenic mice. *Fund Appl Toxicol.* 1969; 29: 294–300.
- Viarengo A, Burlando B, Ceratto N, Panfoli I. Antioxidant role of metallothioneins: a comparative overview. *Cell Mol Biol.* 2000; 46: 407–417. PMID: [10774929](#)
- Miles AT, Hawksworth GM, Beattie JH, Rodilla V. Induction, regulation, degradation, and biological significance of mammalian metallothioneins. *Crit Rev Biochem Mol Biol.* 2000; 35: 35–70. <https://doi.org/10.1080/10409230091169168> PMID: [10755665](#)
- Penkowa M, Carrasco J, Giralt M, Molinero A, Hernández J, Campbell IL, et al. Altered central nervous system cytokine-growth factor expression profiles and angiogenesis in metallothionein-I + II deficient mice. *J Cereb Blood Flow Metab.* 2000; 20: 1174–1189. <https://doi.org/10.1097/00004647-200008000-00003> PMID: [10950378](#)
- Vidal F, Hidalgo J. Effect of zinc and copper on preimplantation mouse embryo development in vitro and metallothionein levels. *Zygote.* 1993; 1: 225–229. PMID: [8081819](#)
- Coyle P, Philcox JC, Carey LC and Rofe AM. Metallothionein: the multipurpose protein. *Cell Mol Life Sci.* 2002; 59: 627–647. PMID: [12022471](#)
- Huggins CJ, Mayekar MK, Martin N, Saylor KL, Gonit M, Jailwala P, et al. C/EBP $\gamma$  is a critical regulator of cellular stress response networks through heterodimerization with ATF4. *Mol Cell Biol.* 2016; 36: 693–713.
- Klaassen CD, Liu J. Induction of metallothionein as an adaptive mechanism affecting the magnitude and progression of toxicological injury. *Environ Health Perspect.* 1998; 106: 297–300. PMID: [9539022](#)
- Pedrini-Martha V, Schenegg R, Baurand PE, deVaufleury A, Dallinger R. The physiological role and toxicological significance of the non-metal-selective cadmium/copper-metallothionein isoform differ between embryonic and adult helix snails. *Comp Biochem Physiol C.* 2017; 199: 38–47.
- Amaro F, de Lucas MP, Martín-González A, Gutiérrez JC. Two new members of the *Tetrahymena* multi-stress-inducible metallothionein family: Characterization and expression analysis of *T. rostrata* Cd/Cu metallothionein genes. *Gene.* 2008; 423: 85–91. <https://doi.org/10.1016/j.gene.2008.07.002> PMID: [18675326](#)
- Boldrin F, Santovito G, Irato P, Piccinni E. Metal interaction and regulation of *Tetrahymena pigmentosa* metallothionein genes. *Protist.* 2002; 153: 283–291. <https://doi.org/10.1078/1434-4610-00105> PMID: [12389817](#)
- Cheung A, Pok L, Vincent KLL, King MC. Tilapia metallothionein genes: PCR-cloning and gene expression studies. *Biochim Biophys Acta.* 2005; 1731: 191–201. <https://doi.org/10.1016/j.bbaexp.2005.09.006> PMID: [16309756](#)
- Díaz S, Amaro F, Rico D, Campos V, Benitez L, Martín-González A, et al. *Tetrahymena* metallothioneins fall into two discrete subfamilies. *PLoS One.* 2007; 2: e291. <https://doi.org/10.1371/journal.pone.0000291> PMID: [17356700](#)

21. Dondero F, Cavaletto M, Chezzi AR, La Terza A, Banni M, Viarengo A. Biochemical characterization and quantitative gene expression analysis of the multi-stress inducible metallothionein from *Tetrahymena thermophila*. *Protist*. 2004; 155: 157–168. <https://doi.org/10.1078/143446104774199565> PMID: 15305793
22. Fu C, Miao W. Cloning and characterization of a new multi-stress inducible metallothionein gene in *Tetrahymena pyriformis*. *Protist*. 2006; 157: 193–203. <https://doi.org/10.1016/j.protis.2006.02.006> PMID: 16621695
23. Guo L, Fu C, Miao W. Cloning, characterization, and gene expression analysis of a novel cadmium metallothionein gene in *Tetrahymena pigmentosa*. *Gene*. 2008; 423: 29–35. <https://doi.org/10.1016/j.gene.2008.04.023> PMID: 18675523
24. Hughes S, Sturzenbaum SR. Single and double metallothionein knockout in the nematode *C. elegans* reveals cadmium dependent and independent toxic effects on life history traits. *Environ Pollut*. 2007; 145: 395–400. <https://doi.org/10.1016/j.envpol.2006.06.003> PMID: 17141712
25. Masters BA, Kelly EJ, Quaife CJ, Brinster RL, Palmiter RD. Targeted disruption of metallothionein I and II genes increases sensitivity to cadmium. *Proc Natl Acad Sci USA*. 1994; 91: 548–588.
26. Gutiérrez JC, Amaro F, Martín-González A. From heavy metal-binders to biosensors: Ciliate metallothioneins discussed. *BioEssays*. 2009; 31: 805–816. <https://doi.org/10.1002/bies.200900011> PMID: 19492353
27. Espart A, Marín M, Gil-Moreno S, Palacios O, Amaro F, Martín-González A, et al. Hints for metal-preference protein sequence determinants: different metal binding features of the five *Tetrahymena thermophila* metallothioneins. *Int J Biol Sci*. 2015; 11: 456–471. <https://doi.org/10.7150/ijbs.11060> PMID: 25798065
28. Adamo GM, Brocca S, Passolunghi S, Salvato B, Lotti M. Laboratory evolution of copper tolerant yeast strains. *Microb Cell Fact*. 2012; 11: 1–11. <https://doi.org/10.1186/1475-2859-11-1> PMID: 22214286
29. Butler PR, Brown M, Oliver SG. Improvement of antibiotic titers from *Streptomyces* bacteria by interactive continuous selection. *Biotechnol Bioeng*. 1996; 49: 185–196. [https://doi.org/10.1002/\(SICI\)1097-0290\(19960120\)49:2<185::AID-BIT7>3.0.CO;2-M](https://doi.org/10.1002/(SICI)1097-0290(19960120)49:2<185::AID-BIT7>3.0.CO;2-M) PMID: 18623568
30. Kumar G, Kuswaha HR, Panjabi-Sabharwal V, Kumari S, Joshi R, Karan R, et al. Clustered metallothionein genes are co-regulated in rice and ectopic expression of *OsMT1e-P* confers multiple abiotic stress tolerance in tobacco via ROS scavenging. *BMC Plant Biology*. 2012; 12: 107. <https://doi.org/10.1186/1471-2229-12-107> PMID: 22780875
31. Costa D, Mariën J, Janssens TKS, van Gestel CAM, Driessen G, Sousa JP, et al. Influence of adaptive evolution of cadmium tolerance on neutral and functional genetic variation in *Orchesella cincta*. *Ecotoxicology*. 2012; 21: 2078–2087. <https://doi.org/10.1007/s10646-012-0961-9> PMID: 22717685
32. Minty JJ, Lesnfsky AA, Lin F, Chen Y, Zaroff TA, Veloso AB, et al. Evolution combined with genomic study elucidates genetic bases of isobutanol tolerance in *Escherichia coli*. *Microb Cell Fact*. 2011; 10: 18. <https://doi.org/10.1186/1475-2859-10-18> PMID: 21435272
33. Van Maris AJ, Winkler AA, Kuyper M, de Laat WT, van Dijken JP, Pronk JT. Development of efficient xylose fermentation in *Saccharomyces cerevisiae*: xylose isomerase as a key component. *Adv Biochem Eng Biotechnol*. 2007; 108: 179–204. [https://doi.org/10.1007/10\\_2007\\_057](https://doi.org/10.1007/10_2007_057) PMID: 17846724
34. Guimaraes PM, Francois J, Parrou JL, Teixeira JA, Domingues L. Adaptive evolution of a lactose-consuming *Saccharomyces cerevisiae* recombinant. *Appl Environ Microbiol*. 2008; 74: 1748–1756. <https://doi.org/10.1128/AEM.00186-08> PMID: 18245248
35. Capecchi MR. Altering the genome by homologous recombination. *Science*. 1989; 244: 1288–1292. PMID: 2660260
36. Amaro F, Turkewitz AP, Martín-González A., Gutiérrez JC. Functional GFP-metallothionein fusion protein from *Tetrahymena thermophila*: a potential whole-cell biosensor for monitoring heavy metal pollution and a cell model to study metallothionein overproduction effects. *Biomaterials*. 2014; 27: 195–205. <https://doi.org/10.1007/s10534-014-9704-0> PMID: 24430977
37. Kataoka K, Schoeberl UE and Mochizuki K. Modules for C-terminal epitope tagging of *Tetrahymena* genes. *J Microbiol Methods*. 2010; 82: 342–346. <https://doi.org/10.1016/j.mimet.2010.07.009> PMID: 20624430
38. Cassidy-Hanley D, Bowen J, Lee JH, Cole E, VerPlank LA, Gaertig J, et al. Germline and somatic transformation of mating *Tetrahymena thermophila* by particle bombardment. *Genetics*. 1997; 146: 135–147. PMID: 9136007
39. Larionov A, Krause A, Miller W. A standard curve based method for relative real time PCR data processing. *BMC Bioinform*. 2005; 6: 62.
40. Huang Y, Agrawal AF. Experimental evolution of gene expression and plasticity in alternative selective regimes. *PloS Genet*. 2016; 12: 1–23.

41. Timmermans MJ, Ellers J, Roelofs D, van Straalen NM. Metallothionein mRNA expression and cadmium tolerance in metal-stressed and reference populations of the springtail *Orchesella cincta*. *Ecotoxicology*. 2005; 14: 727–739. <https://doi.org/10.1007/s10646-005-0020-x> PMID: 16160751
42. Liu N, Scott JG. Increased transcription of CYP6D1 causes cytochrome P450-mediated insecticide resistance in house fly. *Insect Biochem Mol Biol*. 1998; 28: 531–535. PMID: 9753764
43. Niederwanger M, Dvorak M, Schnegg R, Pedrini-Martha V, Bacher K, Bidoli M, Dallinger R. Challenging the metallothionein (MT) gene of *Biomphalaria glabrata*: unexpected response patterns due to cadmium exposure and temperature stress. *J Mol Sci*. 2017; 18: 1747.
44. Van Straalen NM, Janssens TKS, Roelofs D. Micro-evolution of toxicant tolerance: from single genes to the genome's tangled bank. *Ecotoxicology*. 2011; 20: 574–579. <https://doi.org/10.1007/s10646-011-0631-3> PMID: 21416112
45. Höckner M, Dallinger R, Stürzenbaum SR. Nematode and snail metallothioneins. *J Biol Inorg Chem*. 2011; 16: 1057–1065. <https://doi.org/10.1007/s00775-011-0826-3> PMID: 21822727
46. Michalska AE, Choo KHA. Targeting and germ-line transmission of a null mutation at the metallothionein I and II loci in mouse. *Proc Natl Acad Sci USA*. 1993; 90: 8088–8092. PMID: 8367468
47. Egli D, Yepiskoposyan H, Selvaraj A, Balamurugan K, Rajaram R, Simons A, et al. A family knockout of all four *Drosophila* metallothioneinas reveals a central role in copper homeostasis and detoxification. *Mol Cell Biol*. 2006; 26: 2286–2296. <https://doi.org/10.1128/MCB.26.6.2286-2296.2006> PMID: 16508004
48. Li WH, Yang J, Gu X. Expression divergence between duplicated genes. *Trends Genet*. 2005; 21: 602–607. <https://doi.org/10.1016/j.tig.2005.08.006> PMID: 16140417
49. Daniels MJ, Turner-Cavet JS, Selkirk R, Sun H, Parkinson JA, Sadler PJ, et al. Coordination of Zn<sup>2+</sup> (and Cd<sup>2+</sup>) by prokaryotic metallothionein. Involvement of His-Imidazole. *J Biol Chem*. 1998; 273: 22957–22961. PMID: 9722517
50. Blindauer CA. Metallothioneins with unusual residues: histidines as modulators of zinc affinity and reactivity. *J Inorg Biochem*. 2008; 102: 507–21. <https://doi.org/10.1016/j.jinorgbio.2007.10.032> PMID: 18171588
51. Boldrin F, Santovito G, Gaertig J, Wloga D, Cassidy-Hanley D, Clark TG, et al. Metallothionein gene from *Tetrahymena thermophila* with a copper-inducible-repressible promoter. *Eukaryot Cell*. 2006; 5: 422–425. <https://doi.org/10.1128/EC.5.2.422-425.2006> PMID: 16467482
52. Egli D, Domènech J, Selvaraj A, Balamurugan K, Hua H, Capdevila M, et al. The four members of the *Drosophila* metallothionein family exhibit distinct overlapping roles in heavy metal homeostasis and detoxification. *Genes Cell*. 2006; 11: 647–658.
53. Atrian S, Capdevila M. Metallothionein-protein interactions. *BioMol Concepts*. 2013; 4: 143–160. <https://doi.org/10.1515/bmc-2012-0049> PMID: 25436572
54. Knipp M, Meloni G, Roschitzki B, Vasak M. Zn<sub>7</sub>-metallothionein-3 and the synaptic vesicle cycle: interaction of metallothionein-3 with the small GTPase Rab3A. *Biochemistry*. 2005; 44: 3159–3165. <https://doi.org/10.1021/bi047636d> PMID: 15736926
55. Ambjørn M, Asmussen JW, Lindstam M, Gotfryd K, Jacobsen C, Kiselyov VV, et al. Metallothionein and a peptide modeled after metallothionein, EmtinB, induce neuronal differentiation and survival through binding to receptors of the low-density lipoprotein receptor family. *J Neurochem*. 2008; 104: 21–37. <https://doi.org/10.1111/j.1471-4159.2007.05036.x> PMID: 17986228
56. Quiming NS, Vergel RB, Nicolas MG, Villanueva JA. Interaction of bovine serum albumin and metallothionein. *J Health Sci*. 2005; 51: 8–15.
57. Ostrakhovitch EA, Olsson PE, Jiang S, Cherian MG. Interaction of metallothionein with tumor suppressor p53 protein. *FEBS Lett*. 2006; 580: 1235–1238. <https://doi.org/10.1016/j.febslet.2006.01.036> PMID: 16442532
58. Orihuela R, Fernández B, Palacios O, Valero E, Atrian S, Watt RK, et al. Ferritin and metallothionein: dangerous liaisons. *Chem Commun*. 2011; 47: 12155–12157.
59. Maret W, Jacob C, Vallee BL, Fisher EH. Inhibitory sites in enzymes: zinc removal and reactivation by thionein. *Proc Natl Acad Sci USA*. 1999; 96: 1936–1940. PMID: 10051573
60. Huang M, Shaw IF, Petering DH. Interprotein metal exchange between transcription factor IIIa and apometallothionein. *J Inorg Biochem*. 2004; 98: 639–648. <https://doi.org/10.1016/j.jinorgbio.2004.02.004> PMID: 15041244
61. Zeng J, Vallee BL, Kågi JHR. Zinc transfer from transcription factor IIIA fingers to thionein clusters. *Proc Natl Acad Sci USA*. 1991; 88: 9984–9988. PMID: 1835092
62. Eisen JA, Coyne RS, Wu M, Wu D, Thiagarajan M, Wortman JR, et al. Macronuclear genome sequence of the ciliate *Tetrahymena thermophila*, a model eukaryote. *PLoS Biol*. 2006; 4: c286.
